# Supplementary material for: A trans diacyloxylation of indoles
Source: Royal Society of Chemistry journal article supplement (doi:10.1039/c2cc17815j), 2012-01-01

## Support Information

### *A Trans* Diacyloxylation of Indoles

Qiang Liu<sup>a</sup>, Qingyong Zhao<sup>a</sup>, Jie Liu<sup>a</sup>, Pan Wu<sup>a</sup>, Hong Yi<sup>a</sup> and Aiwen Lei<sup>\*a,b</sup>

<sup>a</sup>*College of Chemistry and Molecular Sciences, Wuhan University, Wuhan, Hubei 430072, P. R. China.* <sup>b</sup>*State Key Laboratory for Oxo Synthesis and Selective Oxidation, Lanzhou Institute of Chemical Physics, Chinese Academy of Sciences, 730000, Lanzhou, P. R. China*

aiwenlei@whu.edu.cn,

## Table of Contents

|                                                         |            |
|---------------------------------------------------------|------------|
| <b>General Considerations.....</b>                      | <b>S2</b>  |
| <b>Experimental Procedures.....</b>                     | <b>S3</b>  |
| <b>Characterization of Products and Reactants .....</b> | <b>S7</b>  |
| <b>References.....</b>                                  | <b>S18</b> |
| <b>X-Ray Crystallographic data.....</b>                 | <b>S19</b> |
| <b>NMR Spectra of Products and Reactants.....</b>       | <b>S20</b> |

## General Considerations

All manipulations were carried out using standard Schlenk techniques. Unless otherwise stated, analytical grade solvents and commercially available reagents were used as received. Thin layer chromatography (TLC) employed glass 0.25 mm silica gel plates. Flash chromatography columns were packed with 200-300 mesh silica gel in petroleum ether (bp. 30-60 °C). Gradient flash chromatography was conducted eluting with a continuous gradient from petroleum ether to the ethyl acetate, which were listed below as volume/volume ratios. All new compounds were characterized by  $^1\text{H}$  NMR,  $^{13}\text{C}$  NMR and HRMS. The known compounds were characterized by  $^1\text{H}$  NMR. The  $^1\text{H}$  and  $^{13}\text{C}$  NMR spectra were recorded on a Varian Mercury 300 MHz NMR spectrometer. The characterization data of **1q** and **4q** were reported by us previously.<sup>[1]</sup> The chemical shifts ( $\delta$ ) were given in part per million relative to internal tetramethylsilane (TMS, 0 ppm for  $^1\text{H}$ ) and  $\text{CDCl}_3$  (77.3 ppm for  $^{13}\text{C}$ ). High resolution mass spectra (HRMS) were measured with a Waters Micromass GCT instrument and accurate masses were reported for the molecular ion ( $\text{M}^+$ ). X-ray crystallographic analysis was manipulated on a Bruker SMART CCD area-detector diffractometer. All the structures were analyzed at 298 K using graphite monochromated Mo  $K\alpha$  radiation ( $\lambda = 0.71073\text{\AA}$ ) and solved by direct methods using SHELXS-97 program.

## Experimental Procedures

**General procedure for the synthesis of *tert*-butyl 1*H*-indole-1-carboxylate from substituted indoles with di-*tert*-butyl dicarbonate (5 mmol scale).** A 50 mL flask equipped with a stir-bar was charged with substituted indole (5 mmol) and *N, N*-dimethylpyridin-4-amine (DMAP) (5.0 mmol). 10 mL of THF was added to the flask and the solution was stirred under room temperature. To the mixture (*tert*-butyl carbonic) 3, 3-dimethylbutanoic anhydride (10 mmol) was added dropwise. The reaction mixture was stirred at room temperature and monitored by TLC. After reaction the mixture was then quenched by water (20 mL) and extracted by ethyl acetate (3 x 20 mL). Combined organic phase were dried over anhydrous Na<sub>2</sub>SO<sub>4</sub>, and concentrated under vacuum. The residue was then purified by flash chromatography on silica gel with a mixture eluent of petroleum ether, ethyl acetate. After concentrating the fractions containing the product, the residue was dried under reduced pressure.

| entry | substrate | product |           | yield/% |
|-------|-----------|---------|-----------|---------|
| 1     |           |         | <b>1c</b> | 92      |
| 2     |           |         | <b>1b</b> | 97      |
| 3     |           |         | <b>1g</b> | 76      |
| 4     |           |         | <b>1e</b> | 87      |
| 5     |           |         | <b>1i</b> | 84      |
| 6     |           |         | <b>1k</b> | 99      |
| 7     |           |         | <b>1p</b> | 86      |
| 8     |           |         | <b>1o</b> | 93      |

**General procedure for the synthesis of 1-(1*H*-indol-1-yl)ethanone from substituted indoles with acetic anhydride (5 mmol scale).** A 25 mL flask equipped with a stir-bar was charged with substituted indole (5 mmol) and *N, N*-dimethylpyridin-4-amine (DMAP) (0.4 mmol). 4 mL of

acetic anhydride was added to the flask and the solution was stirred under room temperature. To the mixture 1.3 mL of triethylamine was added dropwise. The reaction mixture was stirred at room temperature overnight and then quenched by saturated sodium bicarbonate solution (20 mL) and extracted by ethyl acetate (3 x 20 mL). Combined organic phase were dried over anhydrous Na<sub>2</sub>SO<sub>4</sub>, and concentrated under vacuum. The residue was then purified by flash chromatography on silica gel with a mixture eluent of petroleum ether, ethyl acetate. After concentrating the fractions containing the product, the residue was dried under reduced pressure.

| 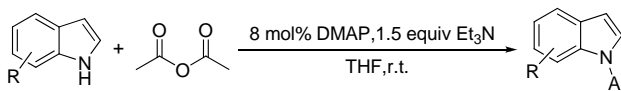 |           |         |           |         |
|------------------------------------------------------------------------------------|-----------|---------|-----------|---------|
| entry                                                                              | substrate | product |           | yield/% |
| 1                                                                                  |           |         | <b>1a</b> | 80      |
| 2                                                                                  |           |         | <b>1d</b> | 98      |
| 3                                                                                  |           |         | <b>1h</b> | 98      |
| 4                                                                                  |           |         | <b>1j</b> | 81      |
| 5                                                                                  |           |         | <b>1l</b> | 88      |

Synthesis of 1-(5-(benzyloxy)-1*H*-indol-1-yl)ethanone **1f** from 5-(benzyloxy)-1*H*-indole with acetic anhydride (3 mmol scale) was reference to the literature method.<sup>[2]</sup>

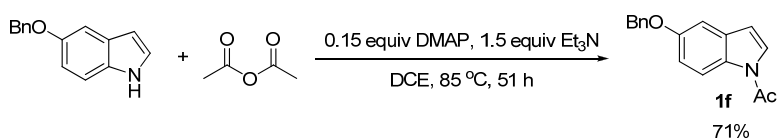

Synthesis of (5-methyl-1*H*-indol-1-yl)(phenyl)methanone **1m** from 5-methyl-1*H*-indole with benzoyl chloride (5 mmol scale) was reference to the literature method.<sup>[2]</sup>

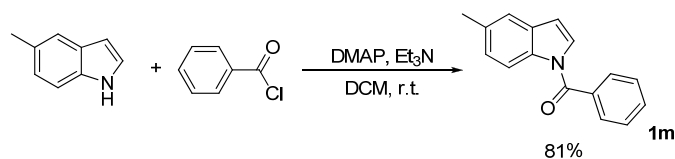

Synthesis of 1-tosyl-1*H*-indole **1n** from 1*H*-indole with 4-methylbenzene-1-sulfonyl chloride (5 mmol scale) was reference to the literature method.<sup>[3]</sup>

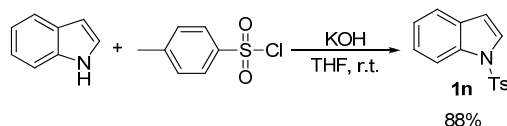

**General procedure for the diacetoxylation reaction of *N*-protected indole derivatives **1** with (diacetoxyiodo)benzene **2** (0.5 mmol scale).** A 10 ml Schlenk tube equipped with a stir-bar was charged with substrate (0.5 mmol), (diacetoxyiodo)benzene (1 mmol). The reaction tube was purged with nitrogen. 2 mL of acetic acid was then added to the reaction tube via a syringe. The Schlenk tube was placed in an oil-bath and heated to 70 °C and monitored by TLC. After reaction, the reaction mixture was cooled to room temperature and then quenched by sodium bisulphite solution (10 mL) and extracted by ethyl acetate (3 x 10 mL). Combined organic phase were dried over anhydrous Na<sub>2</sub>SO<sub>4</sub>, and concentrated under vacuum. The residue was then purified by flash chromatography on silica gel with a mixture eluent of petroleum ether, ethyl acetate. After concentrating the fractions containing the product, the residue was dried under reduced pressure.

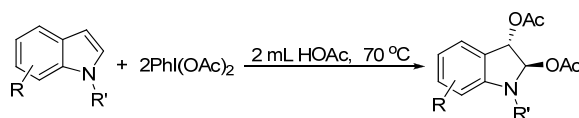

**General procedure for the diacyloxylation reaction of 1-(1*H*-indol-1-yl)ethanone **1a** with (diacetoxyiodo)benzene **2** (0.5 mmol scale).** A 10 ml Schlenk tube equipped with a stir-bar was charged with substrate (0.5 mmol), (diacetoxyiodo)benzene (1 mmol). The reaction tube was purged with nitrogen. 2 mL of carboxylic acid was then added to the reaction tube via a syringe. The Schlenk tube was placed in an oil-bath and heated to 70 °C for 48 h. After reaction, the reaction mixture was cooled to room temperature and then quenched by sodium bisulphite solution (10 mL) and extracted by ethyl acetate (3 x 10 mL). Combined organic phase were washed with saturated sodium carbonate solution (3 x 10 mL) and dried over anhydrous Na<sub>2</sub>SO<sub>4</sub>, and concentrated under vacuum. The residue was then purified by flash chromatography on silica gel with a mixture eluent of petroleum ether, ethyl acetate. After concentrating the fractions containing the product, the residue was dried under reduced pressure.

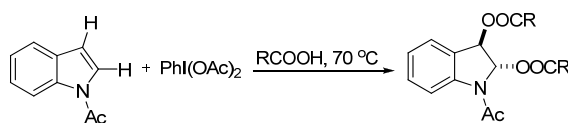

**Procedure for synthesis of *tert*-butyl 3-acetoxy-5-methoxy-1*H*-indole-1-carboxylate **4g** from 1-(*tert*-butoxycarbonyl)-5-methoxyindoline-2, 3-diyl diacetate **3g** (0.5 mmol scale).** A 10 ml Schlenk tube equipped with a stir-bar was charged with substrate (0.5 mmol). The reaction tube was purged with nitrogen. 2 mL of acetic acid was then added to the reaction tube via a syringe. The Schlenk tube was placed in an oil-bath and heated to 70 °C for 13 h. After reaction, the reaction mixture was cooled to room temperature and extracted by ethyl acetate (3 x 10 mL). Combined organic phase were dried over anhydrous Na<sub>2</sub>SO<sub>4</sub>, and concentrated under vacuum. The residue was then purified by flash chromatography on silica gel with a mixture eluent of petroleum ether, ethyl acetate (PE/EA=1:70). After concentrating the fractions containing the

product, the residue was dried under reduced pressure.

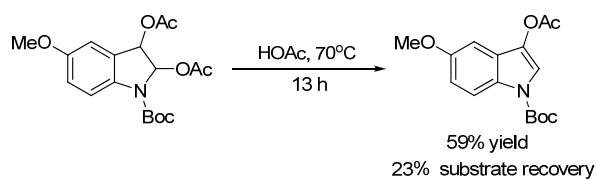

**Table S1.** The optimization for the diacetoxylation reaction of **1a**<sup>a</sup>

| $\text{1a} \xrightarrow[\text{PhI(OAc)}_2]{\text{MeCN/HOAc, 70}^\circ\text{C, 1h}} \text{2} \rightarrow \text{3a}$ |                        |                             |                        |
|--------------------------------------------------------------------------------------------------------------------|------------------------|-----------------------------|------------------------|
| Entry                                                                                                              | HOAc/MeCN <sup>b</sup> | Conversion (%) <sup>c</sup> | Yield (%) <sup>c</sup> |
| 1                                                                                                                  | 1 : 156                | 28                          | N.D.                   |
| 2                                                                                                                  | 1 : 78                 | 26                          | N.D.                   |
| 3                                                                                                                  | 1 : 39                 | 26                          | N.D.                   |
| 4                                                                                                                  | 1 : 5                  | 28                          | N.D.                   |
| 5                                                                                                                  | 1 : 3                  | 16                          | 16                     |
| 6                                                                                                                  | 1 : 1                  | 39                          | 24                     |
| 7                                                                                                                  | 3 : 1                  | 65                          | 51                     |
| 8                                                                                                                  | 5 : 1                  | 90                          | 70                     |
| g <sup>d</sup>                                                                                                     | HOAc                   | 100                         | 78                     |

<sup>a</sup> Reaction conditions: **1** (0.5 mmol), **2** (1 mmol) in 2 mL of MeCN and HOAc mixture at 70 °C. <sup>b</sup> Volume ratio of HOAc to MeCN; <sup>c</sup> Conversion and yield were determined by GC. <sup>d</sup> **1** (0.5 mmol), **2** (1 mmol) in 2 mL of HOAc without MeCN at 70 °C

**Figure S1.** X-Ray crystal structures of **3a** and **3b**

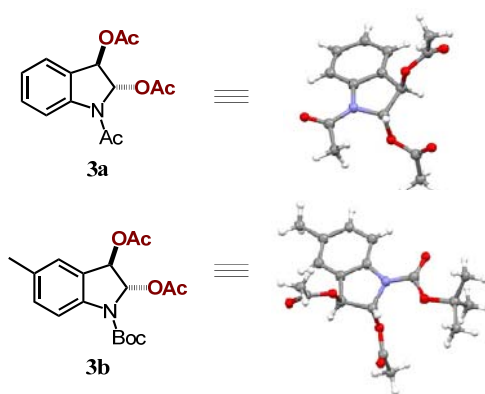

## Characterization of Products and Reactants

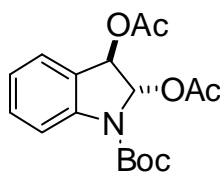

**1-(*tert*-butoxycarbonyl)indoline-2, 3-diyl diacetate (3c):** **1c** (51 uL, 0.25 mmol), **2** (162.3 mg, 0.50 mmol), HOAc (2 mL), 70 °C, 1 hour. After column

chromatography (PE/EA=1:50) 70.3 mg (84%) of a light yellow liquid was obtained. <sup>1</sup>H NMR

(300MHz, CDCl<sub>3</sub>): δ 7.86 (br, 1H), 7.46 (d, *J* = 7.5 Hz, 1H), 7.38 (t, *J* = 7.8 Hz, 1H), 7.07 (t, *J* = 7.5 Hz, 1H), 6.77 (s, 1H), 5.90 (s, 1H), 2.09 (s, 6H), 1.56 (s, 9H); <sup>13</sup>C NMR (75MHz, CDCl<sub>3</sub>): δ

170.2, 169.3, 151.1, 143.5, 131.3, 127.3, 126.6, 123.7, 115.4, 86.8, 82.8, 76.1, 28.6, 21.2, 21.1.

HRMS (APCI) calculated for C<sub>17</sub>H<sub>21</sub>NO<sub>6</sub>Na (M<sup>+</sup>):358.1267; found: 358.1263.

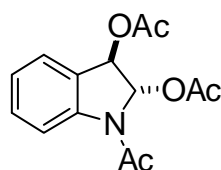

**1-acetylindoline-2, 3-diyl diacetate (3a):** **1a** (80.2 mg, 0.5 mmol) **2** (325.1

mg, 1.0 mmol), HOAc (4 mL), 70 °C, 1 hour. After column chromatography

(PE/EA=1:50) 94.6 mg (68%) of a light yellow solid was obtained. <sup>1</sup>H NMR

(300MHz, CDCl<sub>3</sub>): δ 8.21 (br, 1H), 7.49 (d, *J* = 7.5 Hz, 1H), 7.42 (t, *J* = 7.8 Hz, 1H), 7.14 (t, *J* = 7.5 Hz, 1H), 6.67 (s, 1H), 5.92 (s, 1H), 2.30 (s, 3H), 2.13 (s, 3H), 2.10 (s, 3H); <sup>13</sup>C NMR (75MHz,

CDCl<sub>3</sub>): δ 170.1, 169.9, 169.0, 143.9, 131.4, 130.3, 127.3, 125.0, 117.6, 87.8, 76.3, 23.5, 21.2,

20.8. HRMS (APCI) calculated for C<sub>14</sub>H<sub>15</sub>NO<sub>5</sub>Na (M<sup>+</sup>): 300.0848; found: 300.0846.

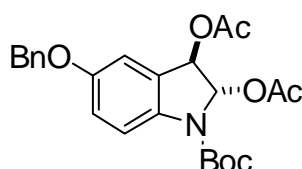

**5-(benzyloxy)-1-(*tert*-butoxycarbonyl)indoline-2, 3-diyl diacetate (3e):**

**1e** (161.5 mg, 0.5mmol), **2** (322.3 mg, 1.0 mmol), HOAc (4 mL), 70 °C,

2 hours. After column chromatography (PE/EA=1:50) 144.1 mg (65%) of

a white solid was obtained. <sup>1</sup>H NMR (300MHz, CDCl<sub>3</sub>): δ 7.70 (br, 1H), 7.33-7.21 (m, 5H), 7.01

(s, 1H), 6.91 (d, *J* = 7.8 Hz, 1H), 6.67 (s, 1H), 5.76 (s, 1H), 4.92 (s, 2H), 1.99 (s, 6H), 1.45 (s, 9H);

$^{13}\text{C}$  NMR (75MHz,  $\text{CDCl}_3$ ):  $\delta$  170.3, 169.4, 155.4, 151.0, 137.0, 128.8, 128.3, 127.8, 118.0, 116.1, 113.6, 86.9, 82.5, 76.2, 70.8, 28.5, 21.2. HRMS (APCI) calculated for  $\text{C}_{24}\text{H}_{27}\text{NO}_7$  ( $\text{M}^+$ ): 441.1788; found: 441.1782.

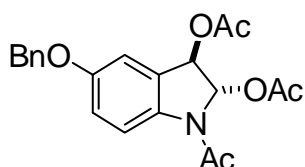

**1-acetyl-5-(benzyloxy)indoline-2, 3-diol diacetate (3f): 1f** (54.3 mg, 0.2 mmol), **2** (129.1 mg, 0.4 mmol), HOAc (2 mL), 70 °C, 2.5 hours.

After column chromatography (PE/EA=1:20) 58.3 mg (76%) of a white solid was obtained.  $^1\text{H}$  NMR (300MHz,  $\text{CDCl}_3$ ):  $\delta$  8.04 (d,  $J$  = 8.7 Hz, 1H), 7.36-7.25 (m, 5H), 7.05 (s, 1H), 6.95 (d,  $J$  = 8.7 Hz, 1H), 6.57 (s, 1H), 5.80 (s, 1H), 4.96 (s, 2H), 2.19 (s, 3H), 2.05 (s, 3H), 2.02 (s, 3H);  $^{13}\text{C}$  NMR (75MHz,  $\text{CDCl}_3$ ):  $\delta$  170.2, 168.5, 156.2, 137.8, 136.9, 128.9, 128.4, 127.9, 118.5, 117.9, 113.4, 88.1, 76.4, 70.8, 23.3, 21.2. HRMS (APCI) calculated for  $\text{C}_{21}\text{H}_{21}\text{NO}_6$  ( $\text{M}^+$ ): 383.1369; found: 383.1367.

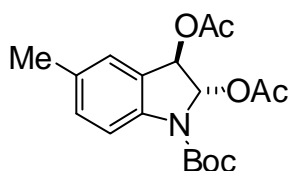

**1-(tert-butoxycarbonyl)-5-methylindoline-2, 3-diol diacetate (3b): 1b** (55  $\mu\text{L}$ , 0.25 mmol), **2** (162.3 mg, 0.50 mmol), HOAc (2 mL), 70 °C, 1 hour. After column chromatography (PE/EA=1:5) 71.8 mg (82%) of a

light yellow solid was obtained.  $^1\text{H}$  NMR (300MHz,  $\text{CDCl}_3$ ):  $\delta$  7.66 (br, 1H), 7.19 (br, 1H), 7.12-7.10 (m, 1H), 6.68 (s, 1H), 5.79 (s, 1H), 2.24 (s, 3H), 2.02-2.00 (m, 6H), 1.48 (s, 9H);  $^{13}\text{C}$  NMR (75MHz,  $\text{CDCl}_3$ ):  $\delta$  170.2, 169.3, 151.0, 141.2, 133.3, 131.8, 127.7, 126.5, 115.0, 86.9, 82.5, 76.1, 28.5, 21.2, 21.1. HRMS (APCI) calculated for  $\text{C}_{18}\text{H}_{23}\text{NO}_6\text{Na}$  ( $\text{M}^+$ ): 372.1423; found: 372.1421.



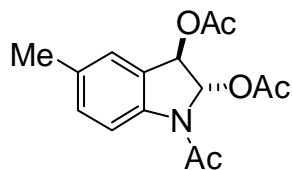

**1-acetyl-5-methylindoline-2, 3-diyl diacetate (3d):** **1d** (87.5 mg, 0.50 mmol), **2** (326.1 mg, 1.0 mmol), HOAc (4 mL), 70 °C, 1 hour.

After column chromatography (PE/EA=1:5) 125.0 mg (86%) of a white solid was obtained. <sup>1</sup>H NMR (300MHz, CDCl<sub>3</sub>): δ 7.99 (br, 1H), 7.22 (br, 1H), 7.15-7.12 (m, 1H), 6.58 (s, 1H), 5.81 (s, 1H), 2.26 (s, 3H), 2.20 (s, 3H), 2.04 (s, 3H), 2.02 (s, 3H); <sup>13</sup>C NMR (75MHz, CDCl<sub>3</sub>): δ 169.8, 169.5, 168.4, 141.3, 134.4, 131.6, 127.3, 126.5, 116.9, 87.6, 76.0, 23.1, 20.9. HRMS (APCI) calculated for C<sub>15</sub>H<sub>17</sub>NO<sub>5</sub> (M<sup>+</sup>): 291.1107; found: 291.1106.

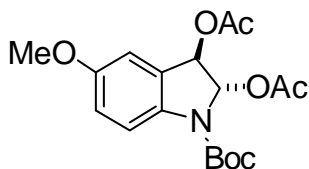

**1-(tert-butoxycarbonyl)-5-methoxyindoline-2, 3-diyl diacetate (3g):**

**1g** (62.0 mg, 0.25 mmol), **2** (160.7 mg, 0.50mmol), HOAc (2 mL), 70 °C, 1 hour. After column chromatography (PE/EA=1:5) 87.7 mg (96%)

of a white solid was obtained. <sup>1</sup>H NMR (300MHz, CDCl<sub>3</sub>): δ 7.80 (br, 1H), 7.01 (br, 1H), 6.93 (d, *J* = 9.0 Hz, 1H), 6.75 (s, 1H), 5.85 (s, 1H), 3.78 (s, 3H), 2.10 (s, 3H), 2.09 (s, 3H), 1.54 (s, 9H); <sup>13</sup>C NMR (75MHz, CDCl<sub>3</sub>): δ 170.3, 169.4, 156.4, 151.2, 137.2, 127.4, 117.1, 116.1, 112.5, 87.1, 82.6, 76.2, 56.1, 28.6, 21.3, 21.2. HRMS (APCI) calculated for C<sub>18</sub>H<sub>23</sub>NO<sub>7</sub>Na (M<sup>+</sup>): 388.1373; found: 388.1369.

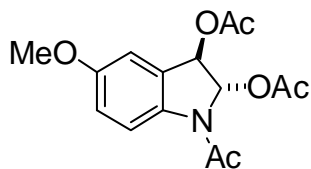

**1-acetyl-5-methoxyindoline-2, 3-diyl diacetate (3h):** **1h** (97.4 mg, 0.50 mmol), **2** (324.7 mg, 1.0 mmol), HOAc (4 mL), 70 °C, 1 hour.

After column chromatography (PE/EA=1:5) 100.8 mg (66%) of a white solid was obtained. <sup>1</sup>H NMR (300MHz, CDCl<sub>3</sub>): δ 8.12-8.09 (m, 1H), 7.02 (br, 1H), 6.95-6.92 (m, 1H), 6.64 (s, 1H), 5.87 (s, 1H), 3.78 (s, 3H), 2.26 (s, 3H), 2.12 (s, 3H), 2.09 (s, 3H);

$^{13}\text{C}$  NMR (75MHz,  $\text{CDCl}_3$ ):  $\delta$  170.2, 170.0, 168.6, 157.2, 137.6, 128.1, 118.5, 117.0, 112.3, 88.1, 76.4, 56.0, 23.3, 21.2. HRMS (APCI) calculated for  $\text{C}_{15}\text{H}_{17}\text{NO}_6\text{Na}$  ( $\text{M}^+$ ): 330.0954; found: 330.0948.

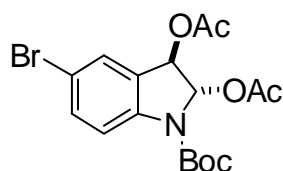

**5-bromo-1-(*tert*-butoxycarbonyl)indoline-2, 3-diyl diacetate (3i): 1i**

(148.5 mg, 0.5 mmol), **2** (322.1 mg, 1.0 mmol), HOAc (4 mL), 70 °C, 29 hours. After column chromatography (PE/EA=1:50) 102.2 mg (50%) of a

white solid was obtained.  $^1\text{H}$  NMR (300MHz,  $\text{CDCl}_3$ ):  $\delta$  7.72 (br, 1H), 7.57 (s, 1H), 7.47 (d,  $J$  = 8.4 Hz, 1H), 6.73 (s, 1H), 5.82 (s, 1H), 2.09 (s, 3H), 2.07 (s, 3H), 1.53 (s, 9H);  $^{13}\text{C}$  NMR (75MHz,  $\text{CDCl}_3$ ):  $\delta$  170.2, 169.3, 150.9, 142.7, 134.2, 130.4, 128.7, 116.9, 116.1, 86.7, 83.3, 75.6, 28.6, 21.2, 21.1. HRMS (APCI) calculated for  $\text{C}_{17}\text{H}_{20}\text{BrNO}_6$  ( $\text{M}^+$ ): 413.0474; found: 413.0477.

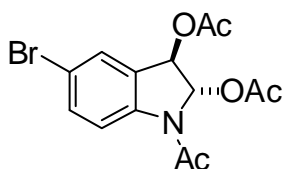

**1-Benzyl-5-bromo-1H-indol-3-yl acetate (3j): 1j** (239.6 mg, 1.0

mmol), **2** (644.6 mg, 2.0 mmol), HOAc (8 mL), 70 °C, 23 hours. After column chromatography (PE/EA=1:5) 263.8 mg (74%) of a white solid

was obtained.  $^1\text{H}$  NMR (300MHz,  $\text{CDCl}_3$ ):  $\delta$  8.09 (br, 1H), 7.65-7.63 (m, 1H), 7.61-7.49 (m, 1H), 6.65 (s, 1H), 5.88 (s, 1H), 2.28 (s, 3H), 2.20-2.10 (m, 6H);  $^{13}\text{C}$  NMR (75MHz,  $\text{CDCl}_3$ ):  $\delta$  169.7, 169.5, 168.6, 142.6, 133.9, 130.0, 128.7, 118.7, 117.0, 87.4, 75.4, 23.1, 20.8. HRMS (APCI) calculated for  $\text{C}_{14}\text{H}_{14}\text{BrNO}_5$  ( $\text{M}^+$ ): 355.0055; found: 355.0052.

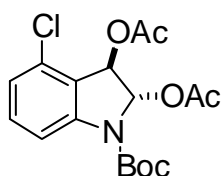

**1-(*tert*-butoxycarbonyl)-4-chloroindoline-2, 3-diyl diacetate (3k): 1k** (63

$\mu\text{L}$ , 0.25 mmol), **2** (161.5 mg, 0.50 mmol), HOAc (2 mL), 70 °C, 12 hours.

After column chromatography (PE/EA=1:5) 83.2 mg (90%) of a light yellow liquid was obtained.

$^1\text{H}$  NMR (300MHz,  $\text{CDCl}_3$ ):  $\delta$  7.76 (br, 1H), 7.32 (t,  $J$  = 8.4 Hz, 1H), 7.04 (d,  $J$  = 8.1 Hz, 1H), 6.71 (s, 1H), 6.09 (s, 1H), 2.13 (s, 3H), 2.09 (s, 3H), 1.52 (s, 9H);  $^{13}\text{C}$  NMR (75MHz,  $\text{CDCl}_3$ ):  $\delta$  169.7, 168.6, 150.9, 145.2, 132.7, 132.2, 123.9, 113.8, 86.4, 83.3, 74.4, 28.5, 21.1, 21.0. HRMS (APCI) calculated for  $\text{C}_{17}\text{H}_{20}\text{NO}_6\text{ClNa}$  ( $\text{M}^+$ ): 392.0877; found: 392.0871.

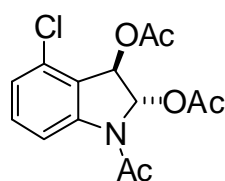

**1-acetyl-4-chloroindoline-2, 3-diyl diacetate (3l): 1l** (97.0 mg, 0.5 mmol), **2** (323.0mg, 1 mmol), HOAc (4 mL), 70 °C, 53.5 hours. After column chromatography (PE/EA=1:5) 117.0 mg (75%) of a white solid was

obtained.  $^1\text{H}$  NMR (300MHz,  $\text{CDCl}_3$ ):  $\delta$  8.10 (br, 1H), 7.36 (t,  $J$  = 8.1 Hz, 1H), 7.12 (d,  $J$  = 8.1 Hz, 1H), 6.64 (s, 1H), 6.12 (s, 1H), 2.26 (s, 3H), 2.14 (s, 6H);  $^{13}\text{C}$  NMR (75MHz,  $\text{CDCl}_3$ ):  $\delta$  169.6, 169.4, 145.4, 132.9, 131.9, 125.8, 125.1, 115.9, 87.4, 74.7, 23.6, 21.2, 21.0. HRMS (APCI) calculated for  $\text{C}_{14}\text{H}_{14}\text{ClNO}_5$  ( $\text{M}^+$ ): 311.0561; found: 311.0556.

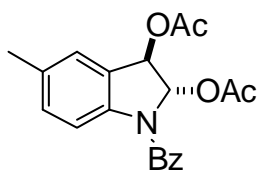

**1-benzoyl-5-methylindoline-2, 3-diyl diacetate (3m): 1m** (118.5 mg ,0.5 mmol), **2** (322.6 mg, 1 mmol), HOAc (4 mL), 70 °C, 7 hours. After column chromatography (PE/EA=1:5) 125.9 mg (71%) of a white solid

was obtained.  $^1\text{H}$  NMR (300MHz,  $\text{CDCl}_3$ ):  $\delta$  7.73 (br, 1H), 7.56-7.42 (m, 5H), 7.33 (s, 1H), 7.19 (d,  $J$  = 8.1 Hz, 1H), 6.52 (s, 1H), 5.85 (s, 1H), 2.34 (s, 3H), 2.08 (s, 3H), 1.97 (s, 3H);  $^{13}\text{C}$  NMR (75MHz,  $\text{CDCl}_3$ ):  $\delta$  169.7, 169.0, 168.8, 141.1, 135.1, 134.7, 131.3, 130.8, 128.5, 127.6, 126.7, 116.9, 105.4, 88.2, 75.5, 20.8, 20.5. HRMS (APCI) calculated for  $\text{C}_{20}\text{H}_{19}\text{NO}_5$  ( $\text{M}^+$ ): 353.1263; found: 353.1260.

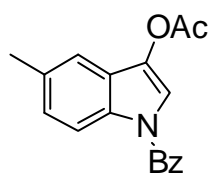

**1-benzoyl-5-methyl-1H-indol-3-yl acetate (4m):** **1m** (118.5 mg, 0.5 mmol), **2** (322.6 mg, 1 mmol), HOAc (4 mL), 70 °C, 7 hours. After column chromatography (PE/EA=1:5) 23.4 mg (16%) of a white solid was obtained. <sup>1</sup>H NMR (300MHz, CDCl<sub>3</sub>): δ 8.21 (d, *J* = 8.7 Hz, 1H), 7.65 (d, *J* = 6.9 Hz, 2H), 7.51-7.43 (m, 4H), 7.16 (d, *J* = 8.4 Hz, 1H), 7.27 (s, 1H), 2.40 (s, 3H), 2.26 (s, 3H); <sup>13</sup>C NMR (75MHz, CDCl<sub>3</sub>): δ 168.8, 168.2, 134.6, 134.3, 134.1, 132.2, 132.0, 129.4, 128.9, 127.7, 124.5, 117.7, 116.6, 116.1, 21.8, 21.3. HRMS (APCI) calculated for C<sub>18</sub>H<sub>15</sub>NO<sub>3</sub> (M<sup>+</sup>): 293.1052; found: 293.1055.

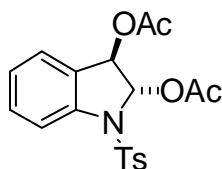

**1-tosylindoline-2,3-diyl diacetate (3n):** **1n** (271.4 mg, 1.0 mmol), **2** (644.6 mg, 2 mmol), HOAc (6 mL), 70 °C, 19 hours. After column chromatography (PE/EA=1:5) 287.8 mg (74%) of a white solid was obtained. <sup>1</sup>H NMR (300MHz, CDCl<sub>3</sub>): δ 7.66 (d, *J* = 8.1 Hz, 2H), 7.57 (d, *J* = 8.7 Hz, 1H), 7.32 (t, *J* = 6.3 Hz, 2H), 7.29-7.19 (m, 2H), 7.05 (t, *J* = 7.8 Hz, 1H), 6.59 (s, 1H), 5.69 (s, 1H), 2.31 (s, 3H), 2.00 (s, 3H), 1.78 (s, 3H); <sup>13</sup>C NMR (75MHz, CDCl<sub>3</sub>): δ 169.4, 169.0, 144.5, 142.4, 135.2, 131.2, 129.6, 127.5, 127.3, 124.7, 115.2, 88.4, 76.0, 21.5, 20.8, 20.5. HRMS (APCI) calculated for C<sub>19</sub>H<sub>19</sub>NO<sub>6</sub>S (M<sup>+</sup>): 389.0933; found: 389.0938.

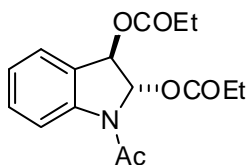

**Diethyl 1-acetylindoline-2,3-dicarboxylate (3r) 1a** (80.2 mg, 0.5 mmol), **2** (323.0 mg, 1 mmol), EtCOOH (4 mL), 70 °C, 40 hours. After column chromatography (PE/EA=1:50) 95.6 mg (63%) of a light yellow liquid was obtained. <sup>1</sup>H NMR (300MHz, CDCl<sub>3</sub>): δ 8.06 (s, 1H), 7.48-7.40 (m, 2H), 7.16 (t, *J* = 7.5

Hz, 1H), 6.73 (s, 1H), 5.97 (s, 1H), 2.41-2.31 (m, 4H), 2.26 (s, 3H), 1.06-1.00 (m, 6H);  $^{13}\text{C}$  NMR (75MHz,  $\text{CDCl}_3$ ):  $\delta$  172.7, 172.5, 168.9, 143.3, 130.8, 126.9, 124.3, 116.1, 86.9, 75.3, 26.5, 23.0, 8.7, 8.5. HRMS (APCI) calculated for  $\text{C}_{16}\text{H}_{19}\text{NO}_5$  ( $\text{M}^+$ ): 305.1263; found: 305.1261.

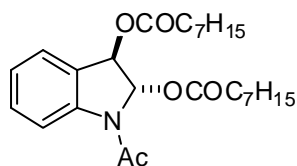

**Diheptyl 1-acetylindoline-2,3-dicarboxylate (3s) 1a** (80.2 mg, 0.5 mmol), **2** (322.2 mg, 1 mmol),  $\text{C}_7\text{H}_{15}\text{COOH}$  (4 mL), 70 °C, 40 hours.

After column chromatography (PE/EA=1:50) 110.4 mg (50%) of a light yellow liquid was obtained.  $^1\text{H}$  NMR (300MHz,  $\text{CDCl}_3$ ):  $\delta$  8.06 (s, 1H), 7.44 (t,  $J$  = 7.2 Hz, 2H), 7.16 (t,  $J$  = 7.5 Hz, 1H), 6.72 (s, 1H), 5.95 (s, 1H), 2.39-2.30 (m, 4H), 2.25 (s, 3H), 1.54 (br, 4H), 1.22 (br, 16H), 0.85-0.81 (m, 6H);  $^{13}\text{C}$  NMR (75MHz,  $\text{CDCl}_3$ ):  $\delta$  172.0, 168.8, 130.8, 126.8, 124.3, 116.1, 87.0, 75.2, 33.1, 31.0, 28.1, 24.2, 24.0, 21.9, 13.8. HRMS (APCI) calculated for  $\text{C}_{26}\text{H}_{35}\text{NO}_5$  ( $\text{M}^+$ ): 445.2828; found: 445.2829.

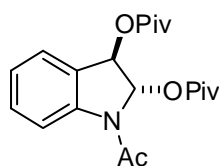

**Diheptyl 1-acetylindoline-2,3-dicarboxylate (3t) 1a** (80.2 mg, 0.5 mmol), **2** (323.1 mg, 1 mmol), PivOH (4 mL), 70 °C, 40 hours. After column

chromatography (PE/EA=1:50) 63.4 mg (35%) of a light yellow liquid was obtained.  $^1\text{H}$  NMR (300MHz,  $\text{CDCl}_3$ ):  $\delta$  8.08 (s, 1H), 7.46-7.41 (m, 2H), 7.16 (t,  $J$  = 7.5 Hz, 1H), 6.65 (s, 1H), 5.90 (s, 1H), 2.24 (s, 3H), 1.14 (s, 18H);  $^{13}\text{C}$  NMR (75MHz,  $\text{CDCl}_3$ ):  $\delta$  176.5, 176.2, 169.0, 143.2, 130.8, 126.6, 126.4, 124.3, 116.1, 87.9, 75.8, 26.5, 26.4, 22.9. HRMS (APCI) calculated for  $\text{C}_{20}\text{H}_{27}\text{NO}_5$  ( $\text{M}^+$ ): 361.1889; found: 361.1892.

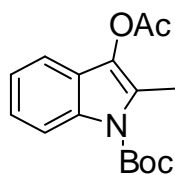

**tert-butyl 3-acetoxy-2-methyl-1H-indole-1-carboxylate (4o): 1o** (115.6 mg, 0.5 mmol), **2a** (324.6 mg, 1.0 mmol), HOAc (4 mL), 70 °C, 1 hour. After column chromatography (PE/EA=1:50) 118.7 mg (82%) of a white solid was obtained.

<sup>1</sup>H NMR (300MHz, CDCl<sub>3</sub>): δ 8.07 (d, *J* = 8.7 Hz, 1H), 7.20-7.15 (m, 3H), 2.37 (s, 3H), 2.32 (s, 3H), 1.59 (s, 9H); <sup>13</sup>C NMR (75MHz, CDCl<sub>3</sub>): δ 169.3, 150.8, 134.0, 131.9, 126.9, 124.4, 123.5, 123.1, 116.8, 116.1, 84.3, 28.6, 20.9, 12.9. HRMS (APCI) calculated for C<sub>16</sub>H<sub>19</sub>NO<sub>4</sub> (M<sup>+</sup>): 289.1314; found: 289.1310.

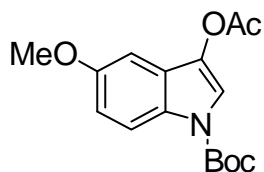

**tert-butyl 3-acetoxy-5-methoxy-1H-indole-1-carboxylate (4g): 3g** (174.8 mg, 0.48 mmol), HOAc (4 mL), 70 °C, 13 hours. After column chromatography (PE/EA=1:70) 90.6 mg (62%) of a white solid was

obtained with 27% of substrate recovery. <sup>1</sup>H NMR (300MHz, CDCl<sub>3</sub>): δ 8.04 (br, 1H), 7.65 (s, 1H), 6.97-6.92 (m, 2H), 3.86 (s, 3H), 2.37 (s, 3H), 1.65 (s, 9H); <sup>13</sup>C NMR (75MHz, CDCl<sub>3</sub>): δ 168.3, 156.3, 149.9, 133.4, 127.9, 124.6, 116.6, 115.2, 114.7, 100.1, 84.0, 56.0, 28.5, 21.3. HRMS (APCI) calculated for C<sub>16</sub>H<sub>19</sub>NO<sub>5</sub>Na (M<sup>+</sup>): 328.1161; found: 328.1159.

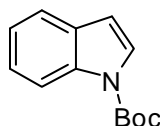

**tert-butyl 1H-indole-1-carboxylate (1c)** <sup>1</sup>H NMR (300MHz, CDCl<sub>3</sub>): δ 8.15 (d, *J* = 7.5 Hz, 1H), 7.60-7.54 (m, 2H), 7.31 (t, *J* = 7.8 Hz, 1H), 7.22 (t, *J* = 7.5 Hz, 1H), 6.66 (d, *J* = 3 Hz, 1H), 1.67 (s, 9H).<sup>[4]</sup>

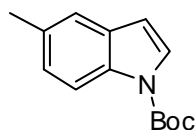

**tert-butyl 5-methyl-1H-indole-1-carboxylate (1b)** <sup>1</sup>H NMR (300MHz, CDCl<sub>3</sub>): δ 7.91 (d, *J* = 8.1 Hz, 1H), 7.44 (s, 1H), 7.21 (s, 1H), 7.11 (d, *J* = 8.7

Hz, 1H), 6.37-6.36 (m, 1H), 2.32 (s, 3H), 1.55 (s, 9H).<sup>[2]</sup>

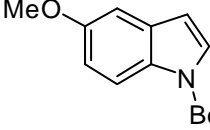 **tert-butyl 5-methoxy-1H-indole-1-carboxylate (1g)** <sup>1</sup>H NMR (300MHz, CDCl<sub>3</sub>): δ 7.94 (d, *J* = 7.2 Hz, 1H), 7.48 (s, 1H), 6.94 (s, 1H), 6.84 (d, *J* = 9.0 Hz, 1H), 6.41 (s, 1H), 3.76 (s, 3H), 1.58 (s, 9H).<sup>[2]</sup>

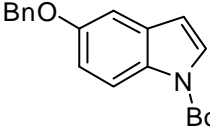 **tert-butyl 5-(benzyloxy)-1H-indole-1-carboxylate (1e)** <sup>1</sup>H NMR (300MHz, CDCl<sub>3</sub>): δ 7.94 (d, *J* = 7.8 Hz, 1H), 7.48-7.47 (m, 1H), 7.37 (d, *J* = 6.9 Hz, 2H), 7.32-7.23 (m, 3H), 7.01-7.00 (m, 1H), 6.92 (dd, *J*<sub>1</sub> = 9.0 Hz, *J*<sub>2</sub> = 2.7 Hz, 1H), 6.40 (d, *J* = 3.6 Hz, 1H), 5.02 (s, 2H), 1.58 (s, 9H).<sup>[5]</sup>

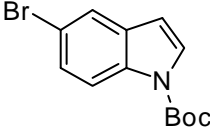 **tert-butyl 5-bromo-1H-indole-1-carboxylate (1i)** <sup>1</sup>H NMR (300MHz, CDCl<sub>3</sub>): δ 7.92 (d, *J* = 8.4 Hz, 1H), 7.56 (s, 1H), 7.48-7.47 (m, 1H), 7.28 (d, *J* = 8.7 Hz, 1H), 6.39-6.38 (m, 1H), 1.56 (s, 9H).<sup>[6]</sup>

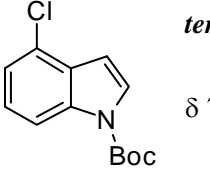 **tert-butyl 4-chloro-1H-indole-1-carboxylate (1k)** <sup>1</sup>H NMR (300MHz, CDCl<sub>3</sub>): δ 7.97 (t, *J* = 4.2 Hz, 1H), 7.53 (d, *J* = 3.3 Hz, 1H), 7.12 (d, *J* = 4.5 Hz, 2H), 6.59 (d, *J* = 3.6 Hz, 1H), 1.58 (s, 9H).<sup>[7]</sup>

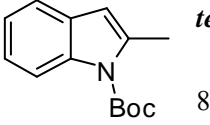 **tert-butyl 3-methyl-1H-indole-1-carboxylate (1o)** <sup>1</sup>H NMR (300MHz, CDCl<sub>3</sub>): δ 8.17 (d, *J* = 8.1 Hz, 1H), 7.50 (d, *J* = 7.5 Hz, 1H), 7.32-7.25 (m, 2H), 6.38 (s, 1H), 2.66 (s, 3H), 1.75 (s, 9H).<sup>[4]</sup>

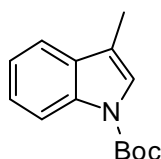

**tert-butyl 2-methyl-1H-indole-1-carboxylate (1p)**  $^1\text{H}$  NMR (300MHz,  $\text{CDCl}_3$ ):  $\delta$  8.04 (d,  $J = 5.7$  Hz, 1H), 7.42 (d,  $J = 8.1$  Hz, 1H), 7.27-7.14 (m, 3H), 2.19 (s, 3H), 1.58 (s, 9H).<sup>[8]</sup>

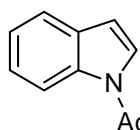

**1-(1H-indol-1-yl)ethanone (1a)**  $^1\text{H}$  NMR (300MHz,  $\text{CDCl}_3$ ):  $\delta$  8.54 (d,  $J = 8.1$  Hz, 1H), 7.67 (d,  $J = 7.5$  Hz, 1H), 7.52-7.36 (m, 3H), 6.74 (s, 1H), 2.74 (s, 3H).<sup>[9]</sup>

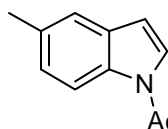

**1-(5-methyl-1H-indol-1-yl)ethanone (1d)**  $^1\text{H}$  NMR (300MHz,  $\text{CDCl}_3$ ):  $\delta$  8.20 (d,  $J = 8.1$  Hz, 1H), 7.24 (s, 2H), 7.05 (d,  $J = 8.4$  Hz, 1H), 6.45-6.44 (m, 1H), 2.48 (s, 3H), 2.38 (s, 3H).<sup>[2]</sup>

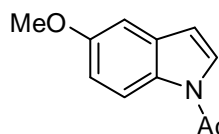

**1-(5-methoxy-1H-indol-1-yl)ethanone (1h)**  $^1\text{H}$  NMR (300MHz,  $\text{CDCl}_3$ ):  $\delta$  8.23 (d,  $J = 8.4$  Hz, 1H), 7.27-7.26 (m, 1H), 6.93-6.92 (m, 1H), 6.87-6.83 (m, 1H), 6.46-6.45 (m, 1H), 3.75 (s, 3H), 2.49 (s, 3H).<sup>[10]</sup>

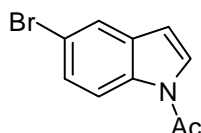

**1-(5-bromo-1H-indol-1-yl)ethanone (1j)**  $^1\text{H}$  NMR (300MHz,  $\text{CDCl}_3$ ):  $\delta$  8.23 (d,  $J = 8.4$  Hz, 1H), 7.59 (s, 1H), 7.34-7.31 (m, 2H), 6.48-6.47 (m, 1H), 2.53 (s, 3H).<sup>[2]</sup>

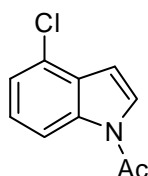

**1-(4-chloro-1H-indol-1-yl)ethanone (1l)**  $^1\text{H}$  NMR (300MHz,  $\text{CDCl}_3$ ):  $\delta$  8.26 (t,  $J = 4.5$  Hz, 1H), 7.36 (d,  $J = 3.9$  Hz, 1H), 7.19 (d,  $J = 4.2$  Hz, 2H), 6.68 (d,  $J = 4.2$



Hz, 1H), 2.56 (s, 3H).<sup>[11]</sup>

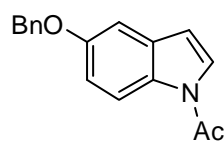

**1-(5-(benzyloxy)-1H-indol-1-yl)ethanone (1f)** <sup>1</sup>H NMR (300MHz, CDCl<sub>3</sub>):

δ 8.24 (d, *J* = 8.1 Hz, 1H), 7.37-7.25 (m, 6H), 6.99-6.93 (m, 2H), 6.44 (s, 1H),  
5.00 (s, 2H), 2.48 (s, 3H).<sup>[12]</sup>

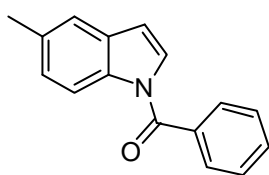

**(5-methyl-1H-indol-1-yl)(phenyl)methanone (1m)** <sup>1</sup>H NMR (300MHz,

CDCl<sub>3</sub>): δ 8.19 (d, *J* = 8.4 Hz, 1H), 7.31 (d, *J* = 6.9 Hz, 2H), 7.50-7.37

(m, 3H), 7.28 (s, 1H), 7.14-7.08 (m, 2H), 6.42 (d, *J* = 3.6 Hz, 1H), 2.36

(s, 3H).<sup>[2]</sup>

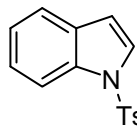

**1-tosyl-1H-indole (1n)** <sup>1</sup>H NMR (300MHz, CDCl<sub>3</sub>): δ 7.99 (d, *J* = 8.1 Hz, 1H),

7.76 (d, *J* = 7.2 Hz, 2H), 7.56-7.51 (m, 2H), 7.30-7.20 (m, 5H), 6.65 (s, 1H),

2.33 (s, 3H).<sup>[9]</sup>

## References

- [1] Q. Liu, G. Li, H. Yi, P. Wu, J. Liu, A. Lei, *Chem.Eur. J.* **2011**, *17*, 2353-2357.
- [2] S. Kirchberg, R. Froehlich, A. Studer, *Angew. Chem., Int. Ed.* **2009**, *48*, 4235-4238, .
- [3] Y. Kikugawa, *Synthesis* **1981**, 460-461.
- [4] D. Dhanak, C. B. Reese, *J. Chem. Soc., Perkin Trans. 1* **1986**, 2181-2186.
- [5] N. Pagano, J. Maksimoska, H. Bregman, D. S. Williams, R. D. Webster, F. Xue, E. Meggers, *Org. Biomol. Chem.* **2007**, *5*, 1218-1227.
- [6] M. Chakrabarty, T. Kundu, Y. Harigaya, *Synth. Commun.* **2006**, *36*, 2069-2077.
- [7] L. C. Henderson, M. J. Lindon, M. C. Willis, *Tetrahedron* **2010**, *66*, 6632-6638.
- [8] C. A. Baxter, E. Cleator, M. Alam, A. J. Davies, A. Goodyear, M. O'Hagan, *Org. Lett.* **2010**, *12*, 668-671.
- [9] M. Arisawa, Y. Terada, K. Takahashi, M. Nakagawa, A. Nishida, *J. Org. Chem.* **2006**, *71*, 4255-4261.
- [10] S. Potavathri, A. S. Dumas, T. A. Dwight, G. R. Naumiec, J. M. Hammann, B. DeBoef, *Tetrahedron Lett.* **2008**, *49*, 4050-4053.
- [11] T. Benkovics, I. A. Guzei, T. P. Yoon, *Angew. Chem., Int. Ed.* **2010**, *49*, 9153-9157,.
- [12] R. Jautelat, T. Brumby, M. Schaefer, H. Briem, G. Eisenbrand, S. Schwahn, M. Krueger, U. Luecking, O. Prien, G. Siemeister, *ChemBioChem* **2005**, *6*, 531-540.

## X-Ray Crystallographic data

Single crystals of product **3a** suitable for X-ray crystallographic analysis were obtained via slow evaporation of CH<sub>2</sub>Cl<sub>2</sub>–CH<sub>3</sub>OH solution. Crystal data of **3a** (C<sub>14</sub> H<sub>15</sub> N<sub>1</sub> O<sub>5</sub>): Mw = 277.27, Space group P2<sub>1</sub>/c, Z=4, Bond precision: C-C = 0.0035 Å, Wavelength=0.71073; Cell: a=8.8633(10) b=18.912(2) c=8.4229(9); alpha=90, beta=94.108(2), gamma=90, V=1408.2, R(reflections)= 0.0595(2132) wR2(reflections)= 0.1555(2529).

Crystallographic data (excluding structure factors) have been deposited with the Cambridge Crystallographic Centre with deposition No. CCDC 822882. Copy of the data can be obtained, free of charge, on application to the CCDC, 12 Union Road, Cambridge CB2 1EZ UK (Email: deposit@ccdc.cam.ac.uk).

Single crystals of product **3b** suitable for X-ray crystallographic analysis were obtained via slow evaporation of CH<sub>2</sub>Cl<sub>2</sub>–CH<sub>3</sub>OH solution. Crystal data of **3b** (C<sub>18</sub> H<sub>23</sub> N<sub>1</sub> O<sub>6</sub>): Mw = 349.37, Space group P-1, Z=4, Bond precision: C-C = 0.0052 Å, Wavelength= 0.71073; Cell: a=9.1850(7) b=13.9246(11) c=16.2335(13); alpha=75.704(2) beta=87.418(2) gamma=72.161(2), V=1914.1, R(reflections)= 0.0638(3393) wR2(reflections)= 0.1515(7448).

Crystallographic data (excluding structure factors) have been deposited with the Cambridge Crystallographic Centre with deposition No. CCDC 822881. Copy of the data can be obtained, free of charge, on application to the CCDC, 12 Union Road, Cambridge CB2 1EZ UK (Email: deposit@ccdc.cam.ac.uk).

## NMR Spectra of Products and Reactants

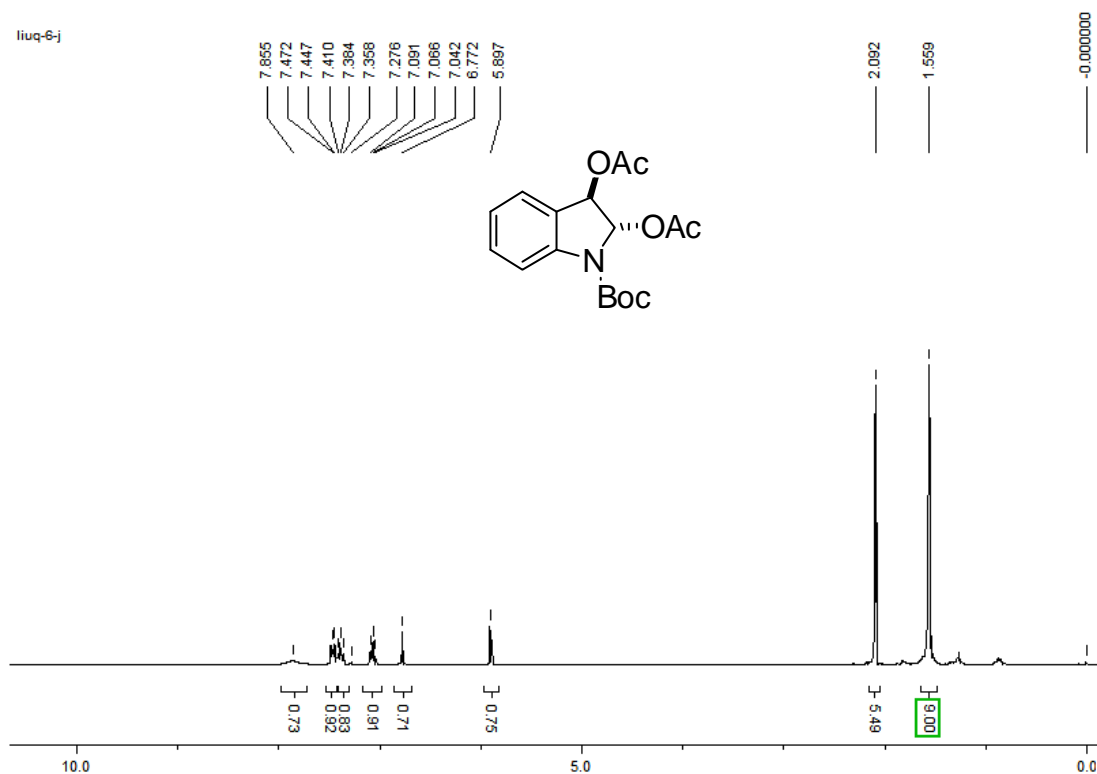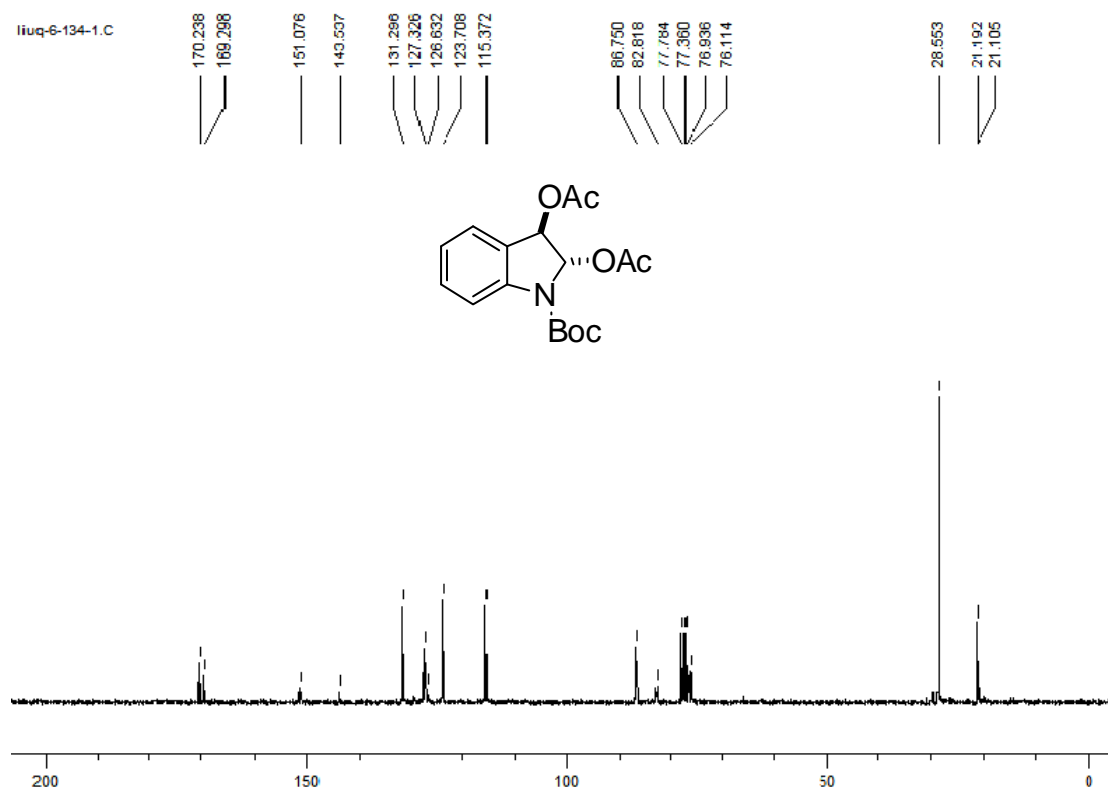

## Display Report

### Analysis Info

Analysis Name D:\Data\zfi\2010915\_000013.d  
Method XMASS\_Method  
Sample Name 184-5  
Comment

Acquisition Date 9/15/2010 1:51:11 PM

Operator FTMS\_USER  
Instrument apex-III

### Acquisition Parameter

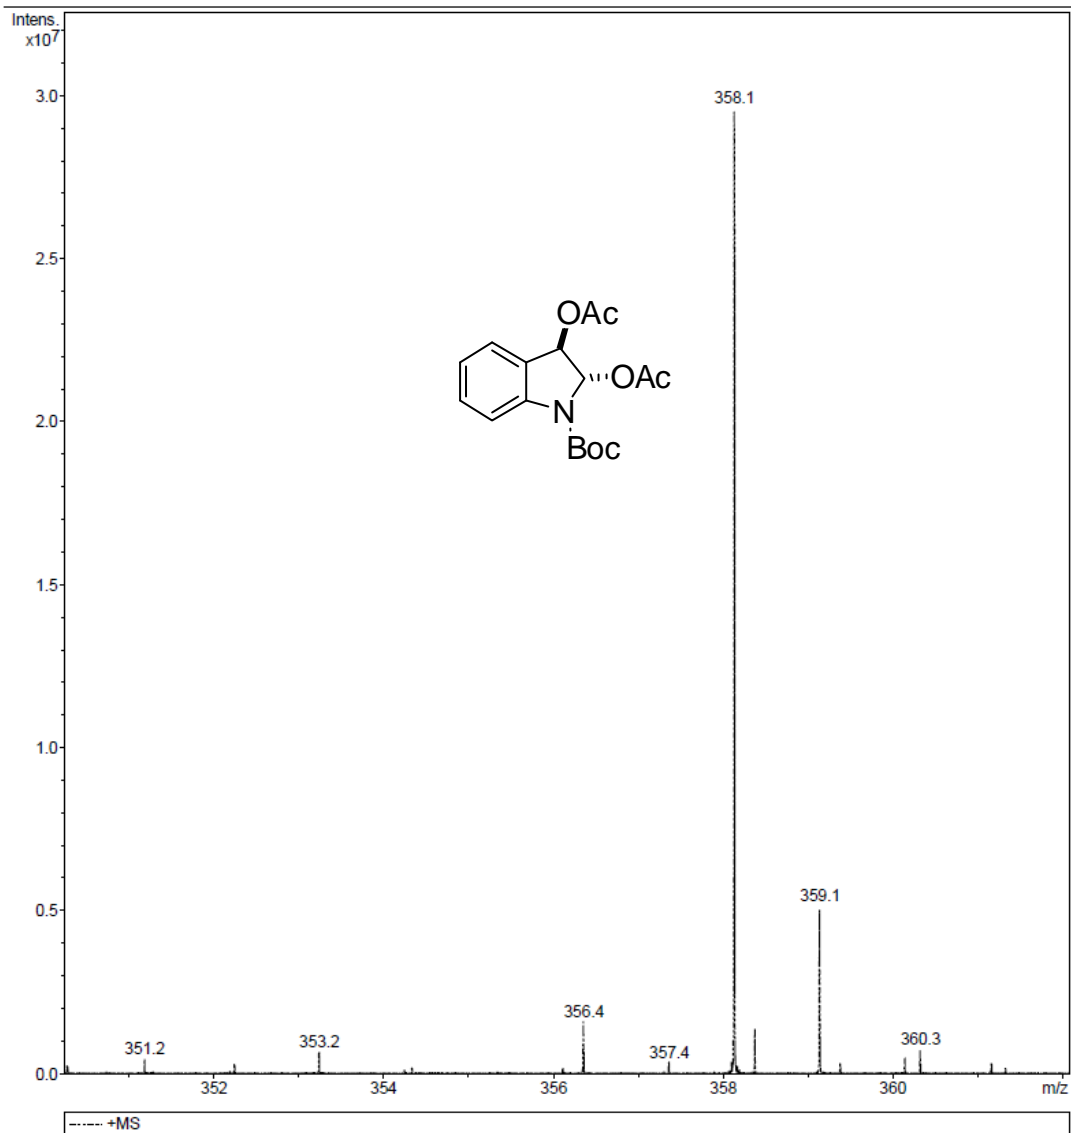

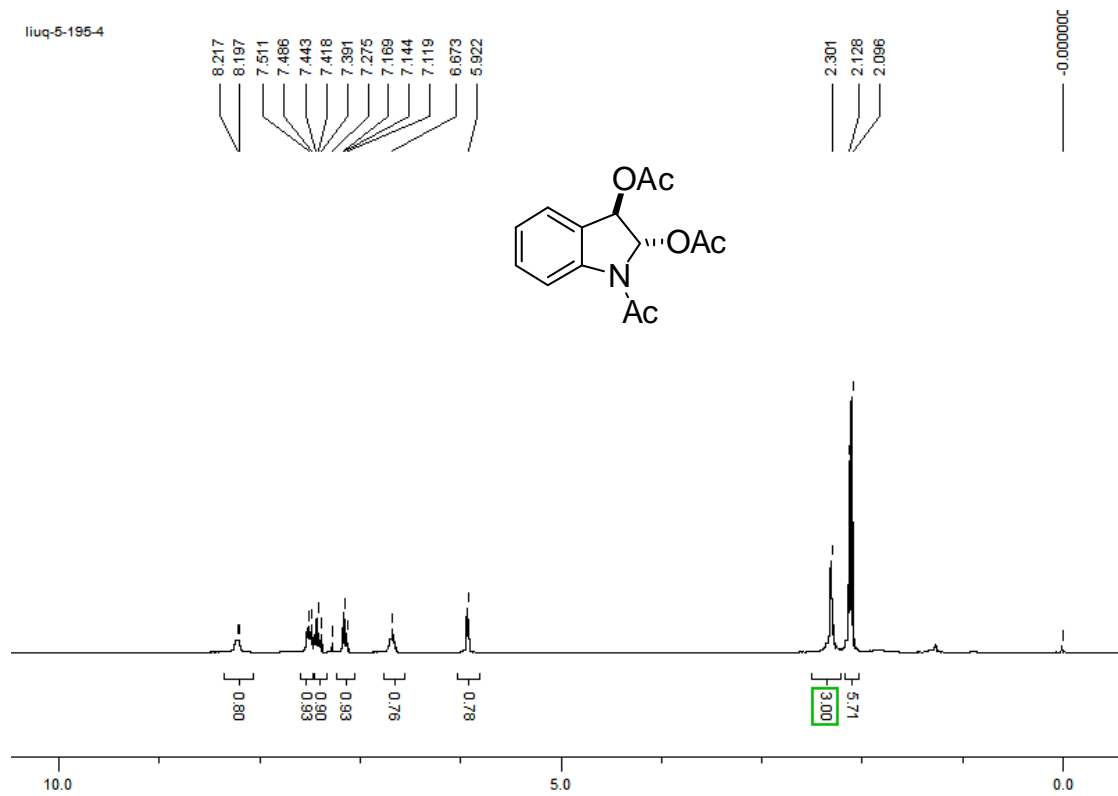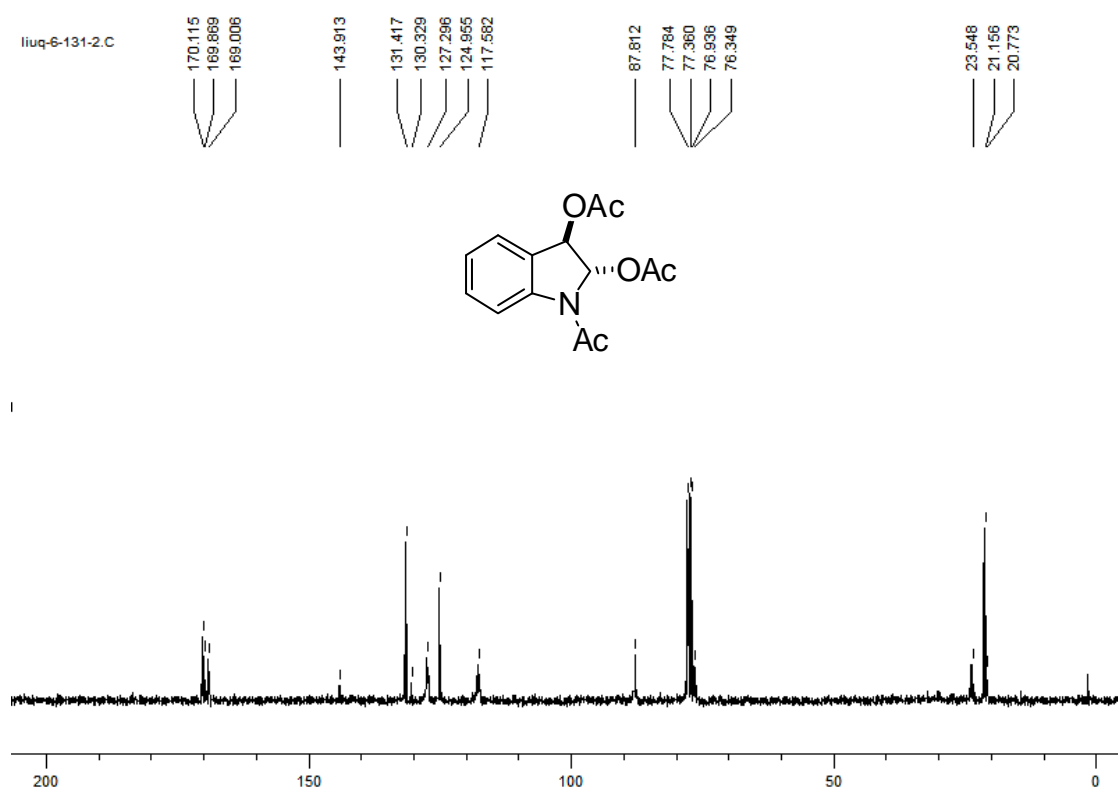

Display Report

Analysis Info

Analysis Name D:\Data\zfj\2010915\_000007.d  
Method XMASS\_Method  
Sample Name 184-8  
Comment

Acquisition Date 9/15/2010 10:29:10 AM

Operator FTMS\_USER  
Instrument apex-III

Acquisition Parameter

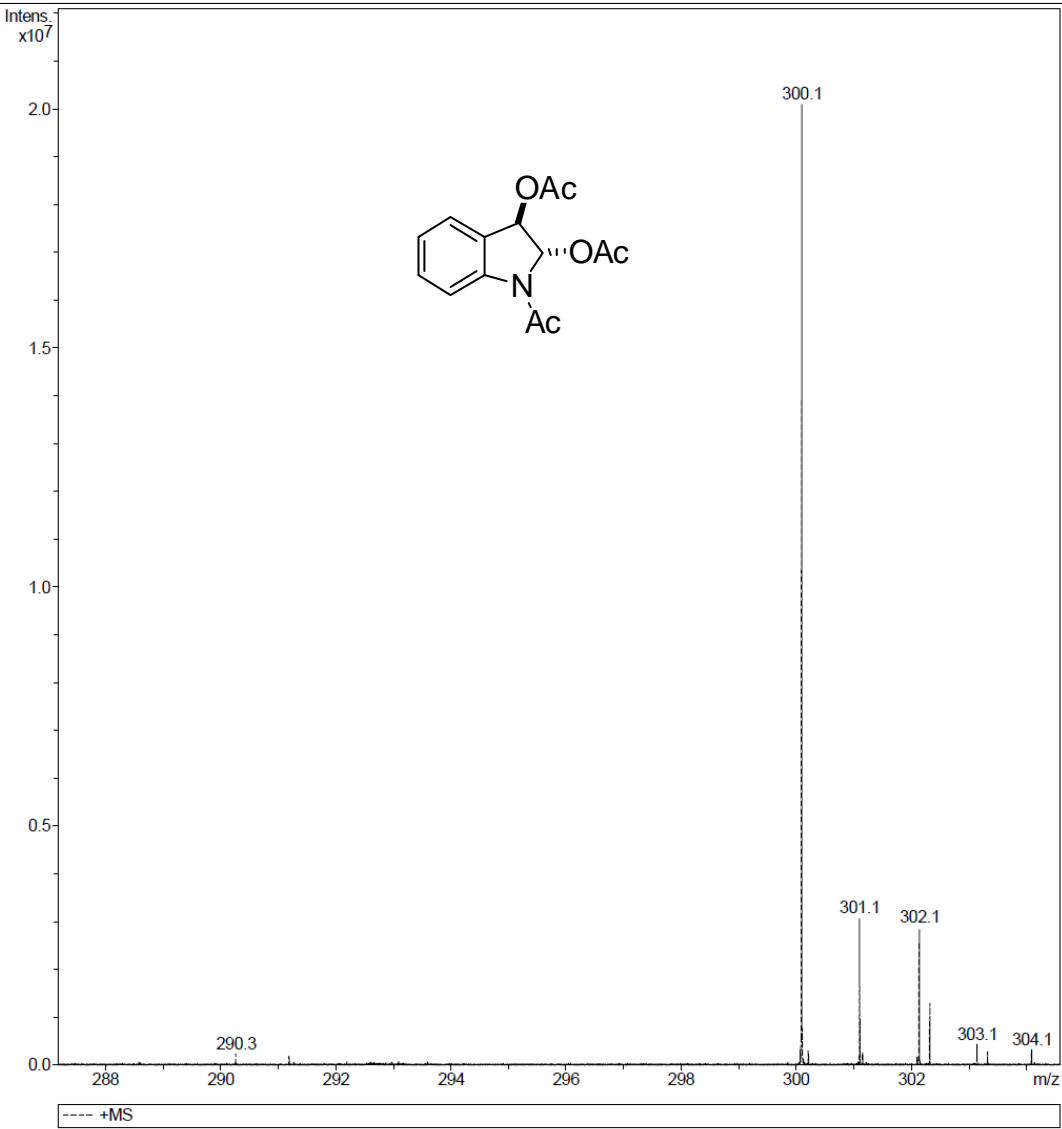

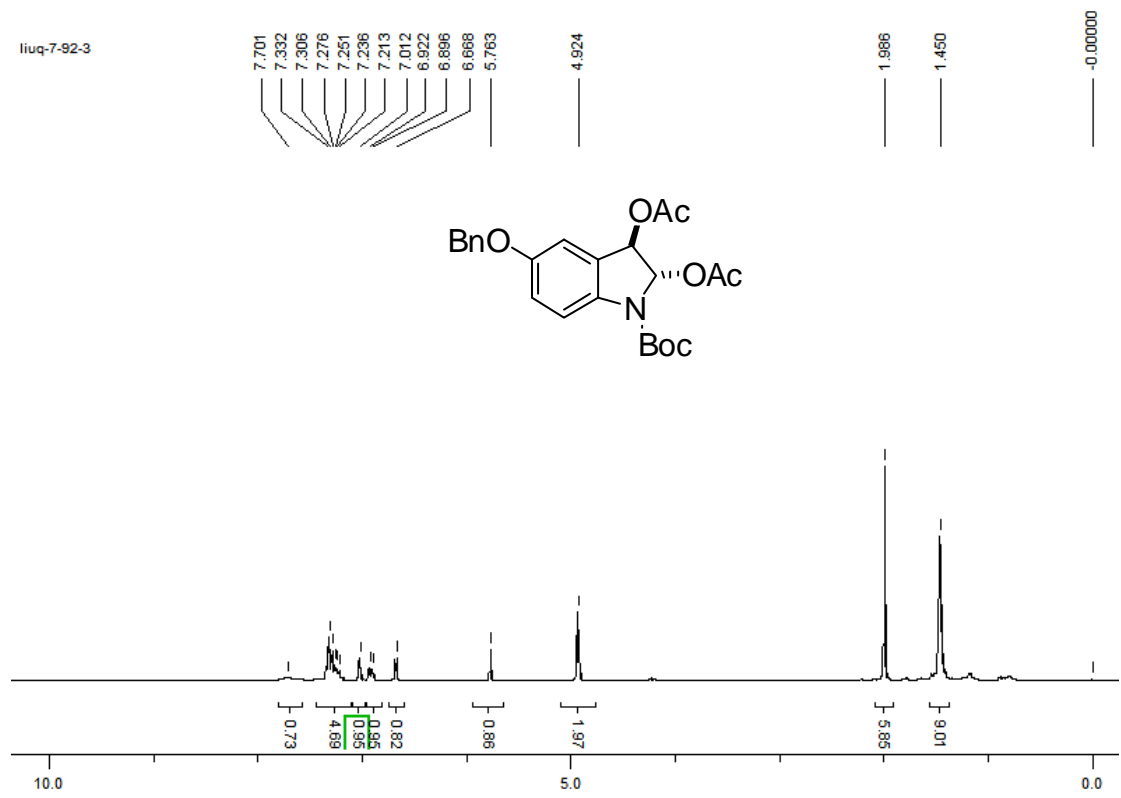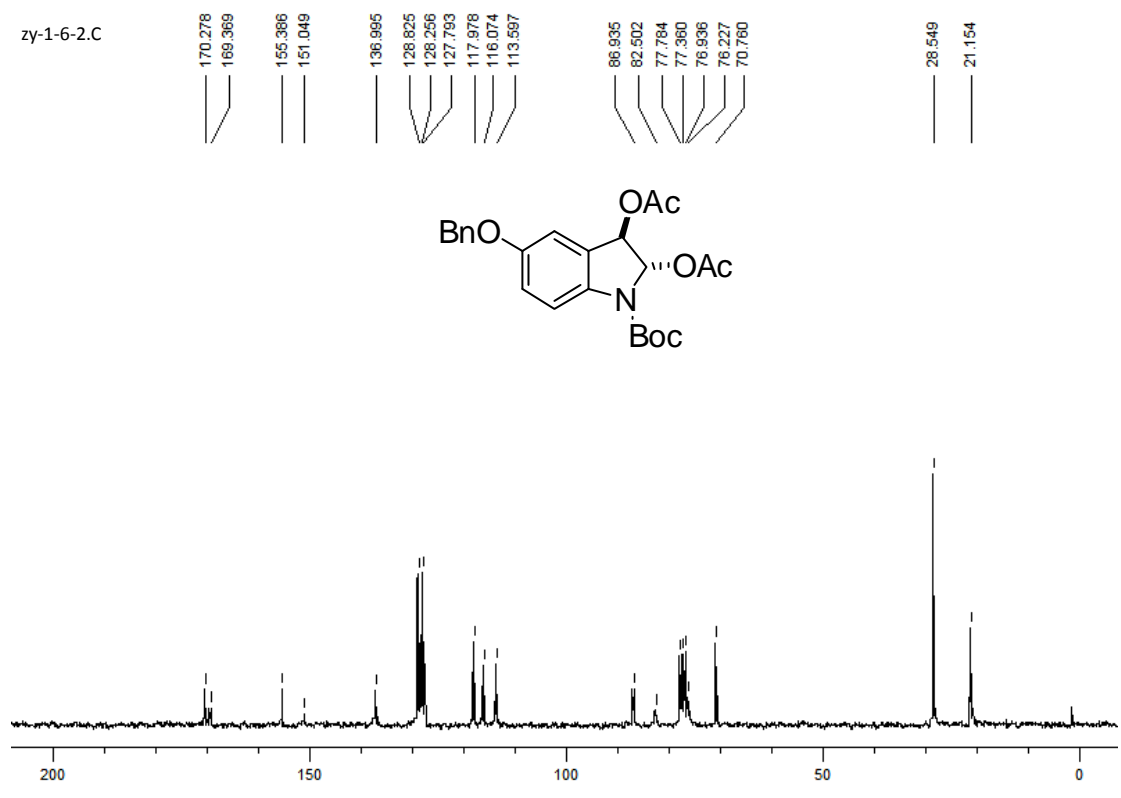



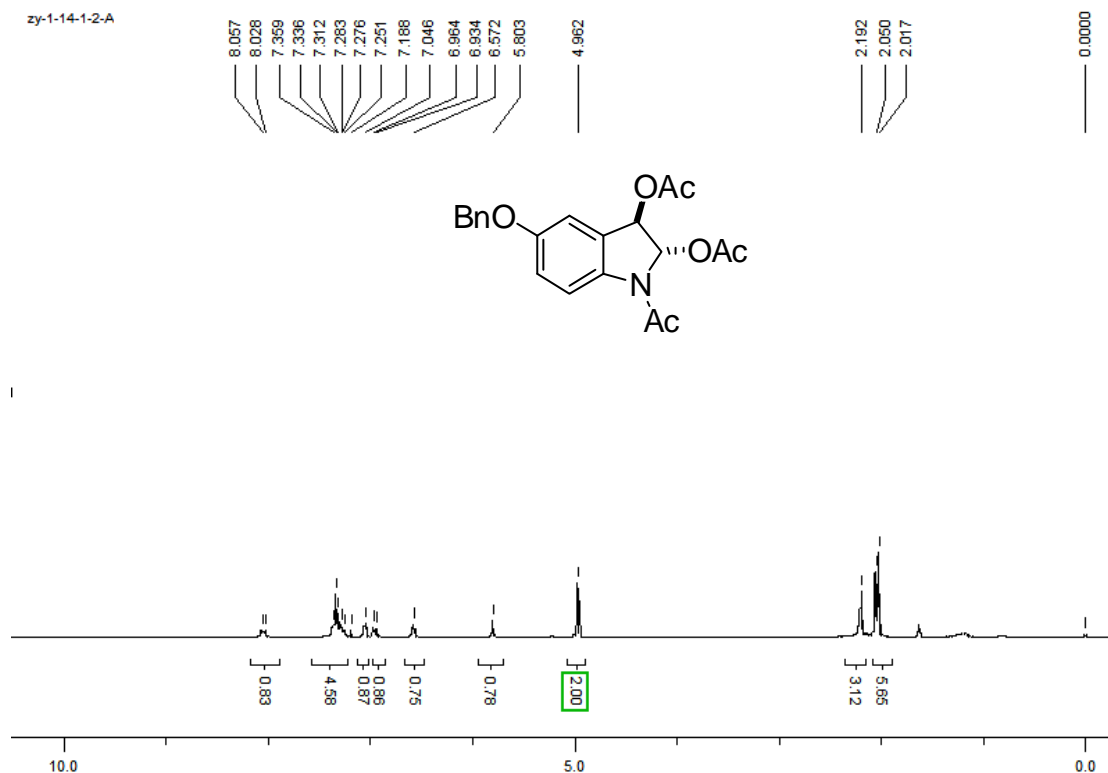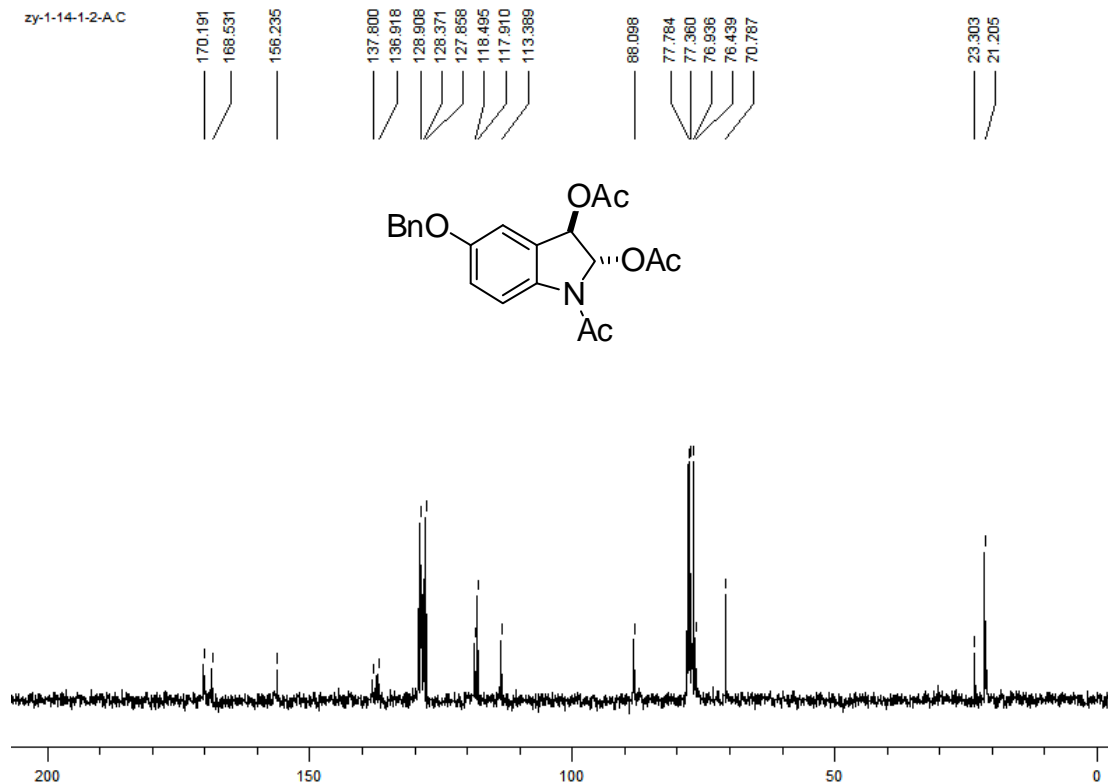

liuq-6-158-1

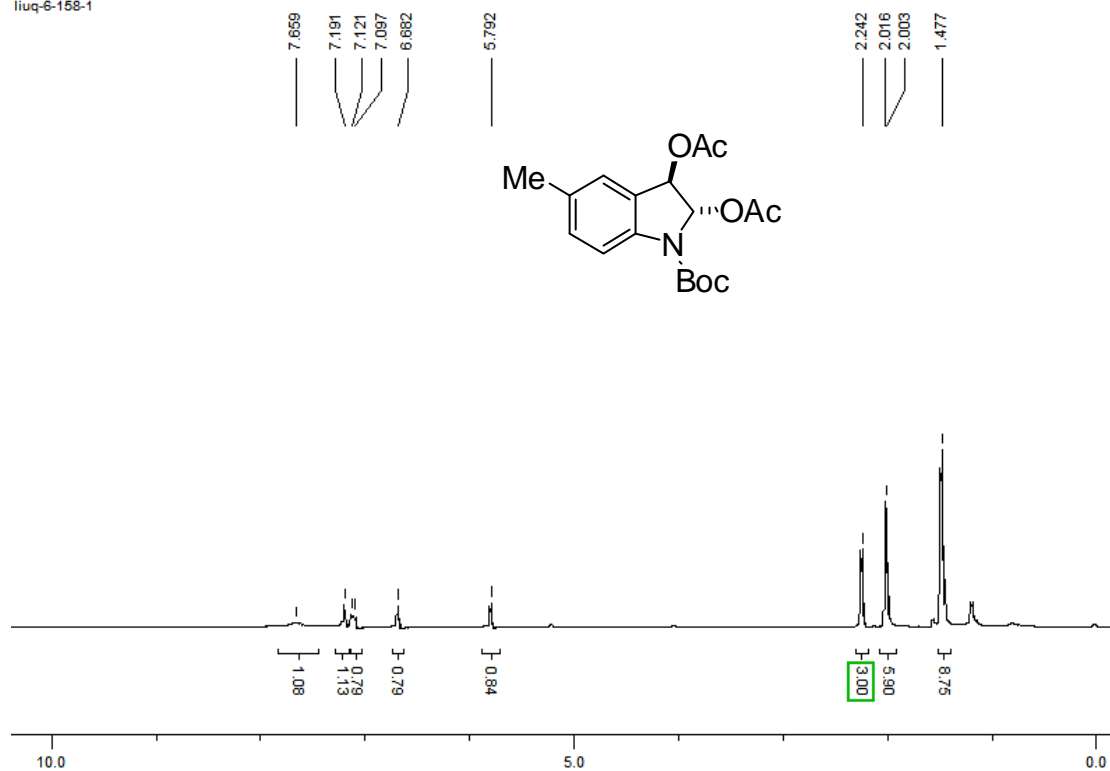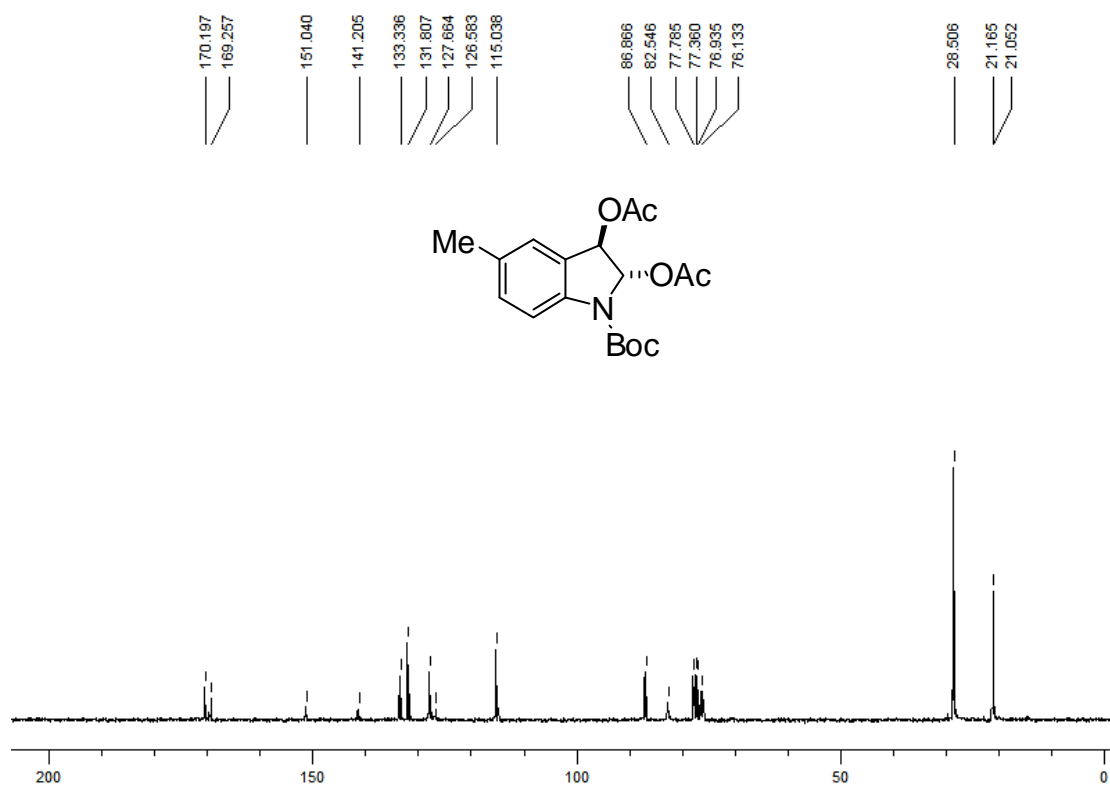

## Display Report

### Analysis Info

Analysis Name D:\Data\zff\2010915\_000018.d  
Method XMASS\_Method  
Sample Name 184-7  
Comment

Acquisition Date 9/15/2010 3:07:18 PM

Operator FTMS\_USER  
Instrument apex-III

### Acquisition Parameter

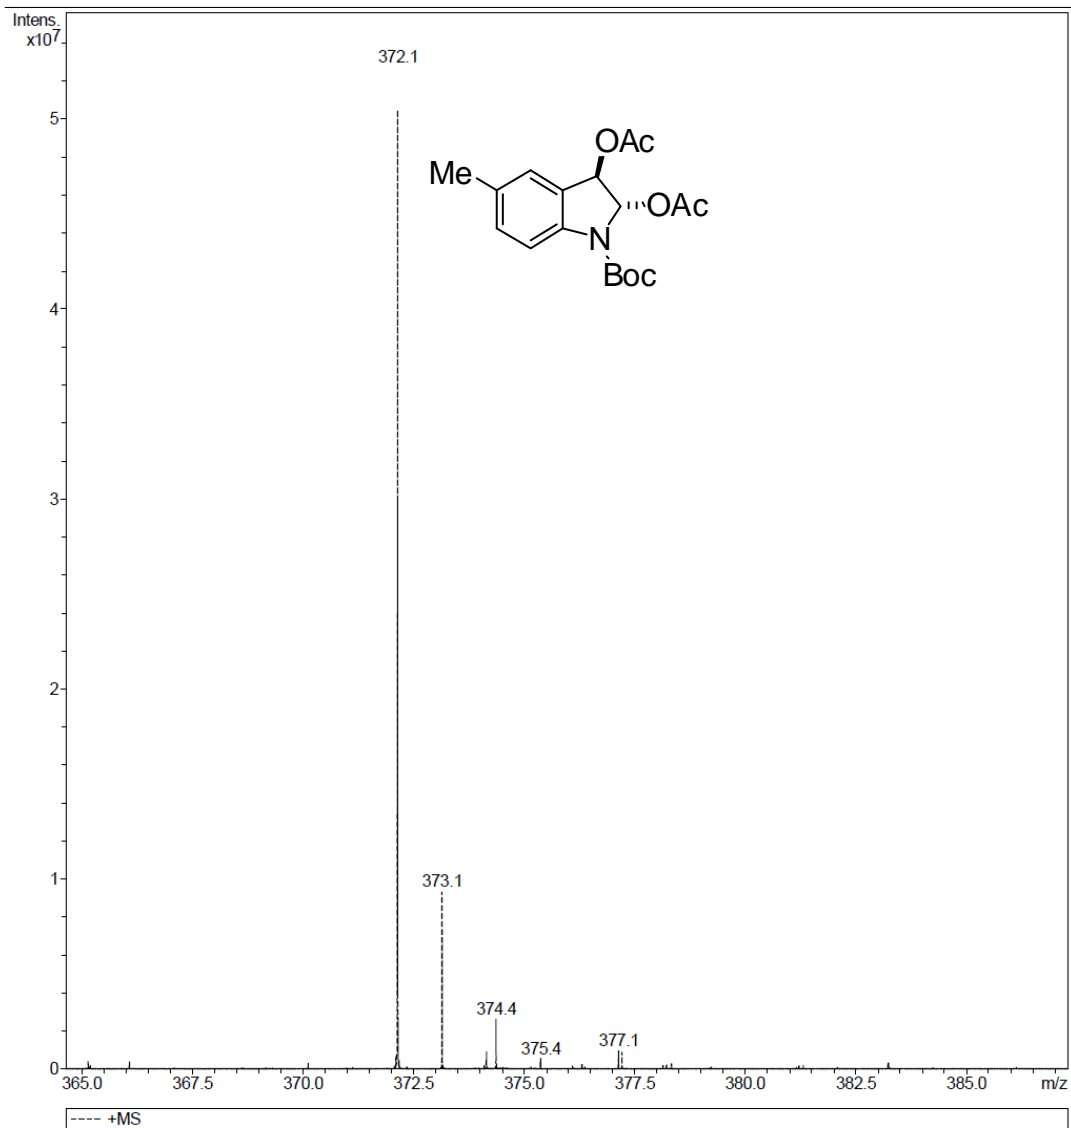

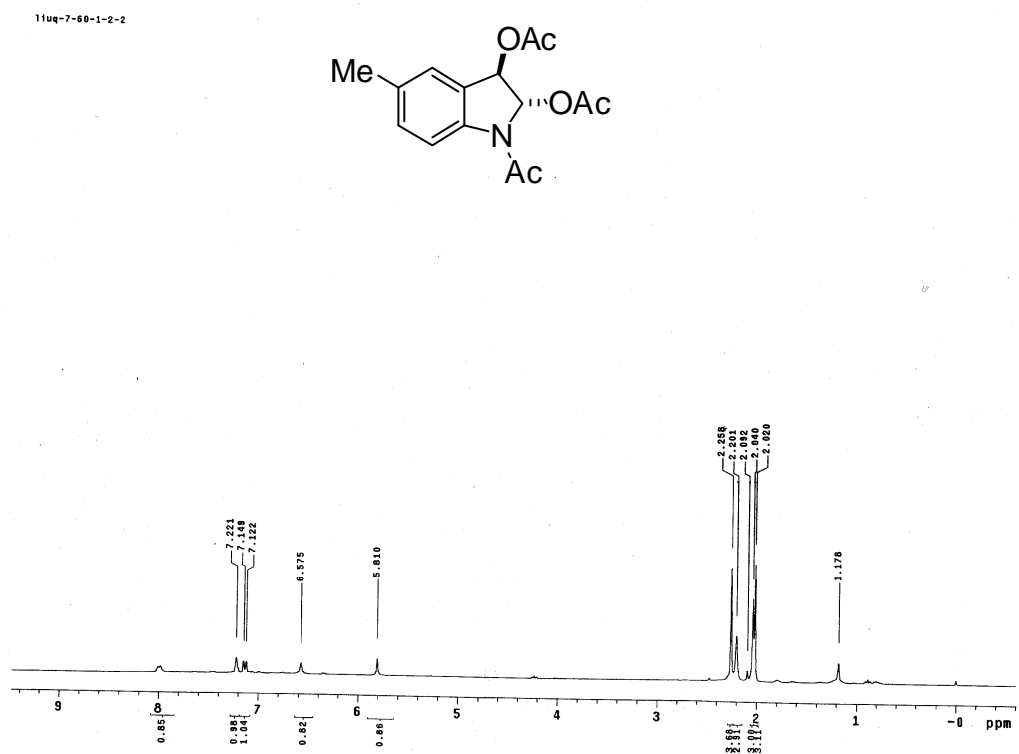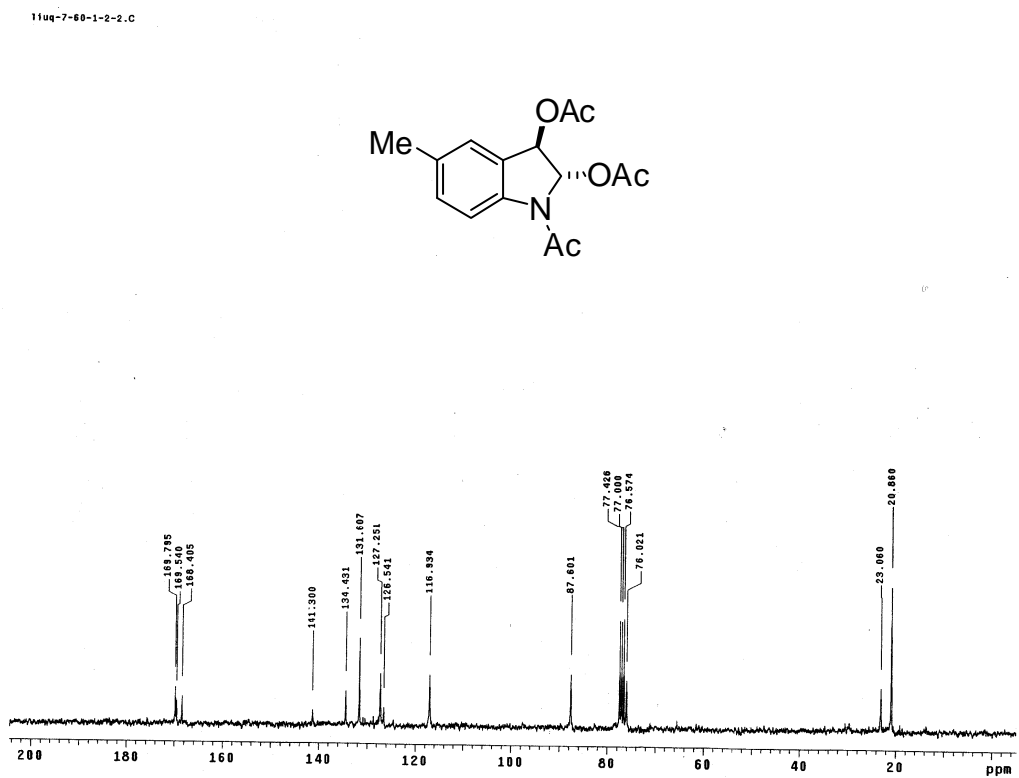

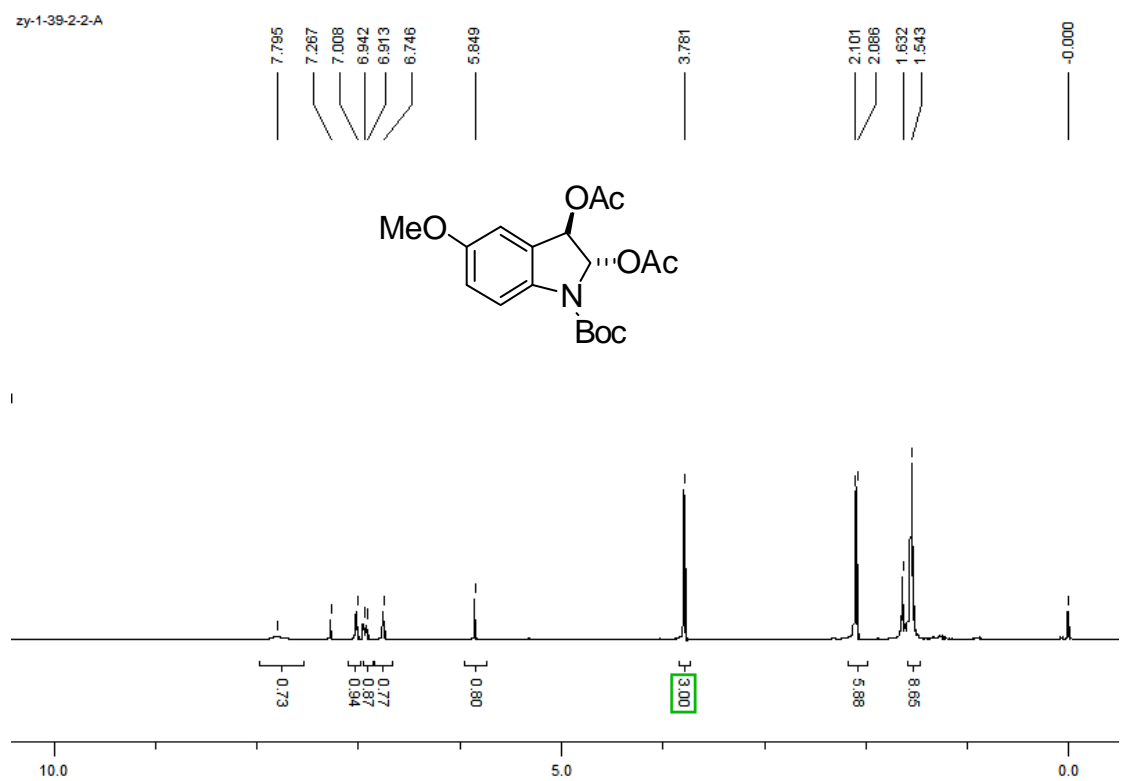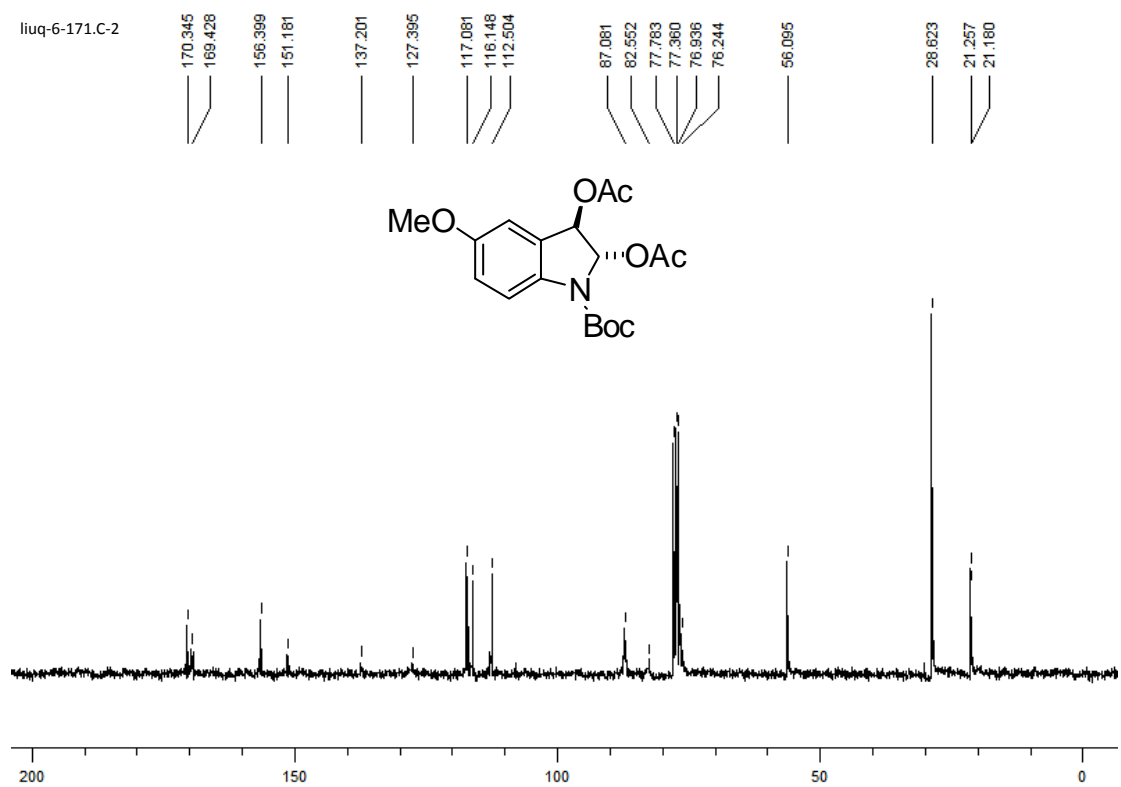

Display Report

|                      |                              |                                       |           |
|----------------------|------------------------------|---------------------------------------|-----------|
| <b>Analysis Info</b> |                              | Acquisition Date 9/15/2010 4:05:09 PM |           |
| Analysis Name        | D:\Data\zff\2010915_000020.d | Operator                              | FTMS_USER |
| Method               | XMASS_Method                 | Instrument                            | apex-III  |
| Sample Name          | 184-9                        |                                       |           |
| Comment              |                              |                                       |           |

Acquisition Parameter

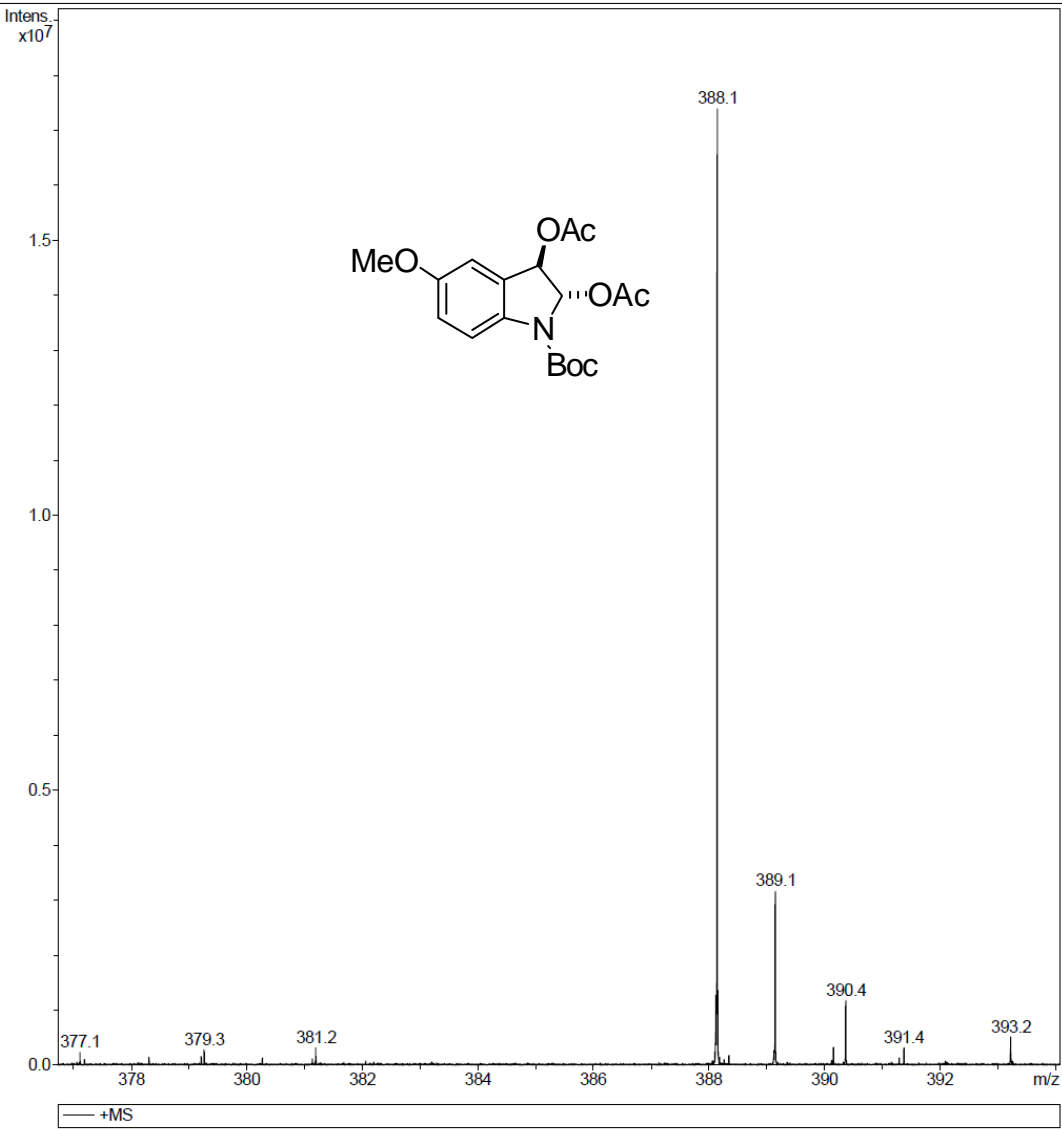

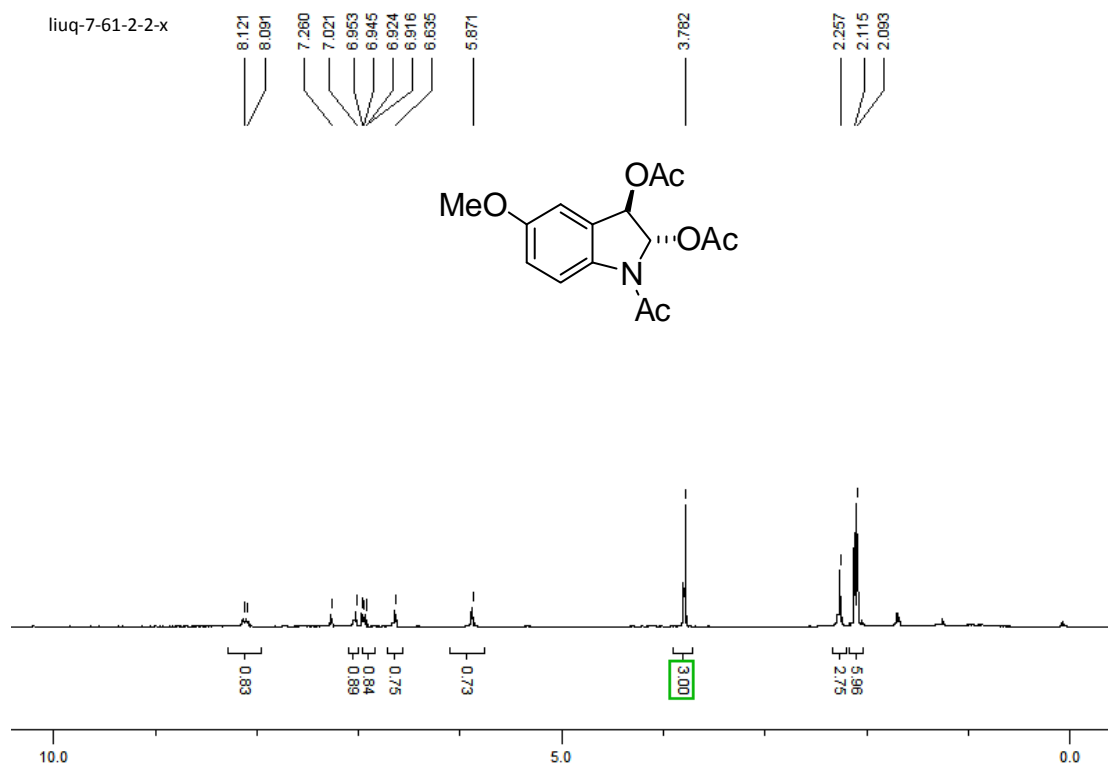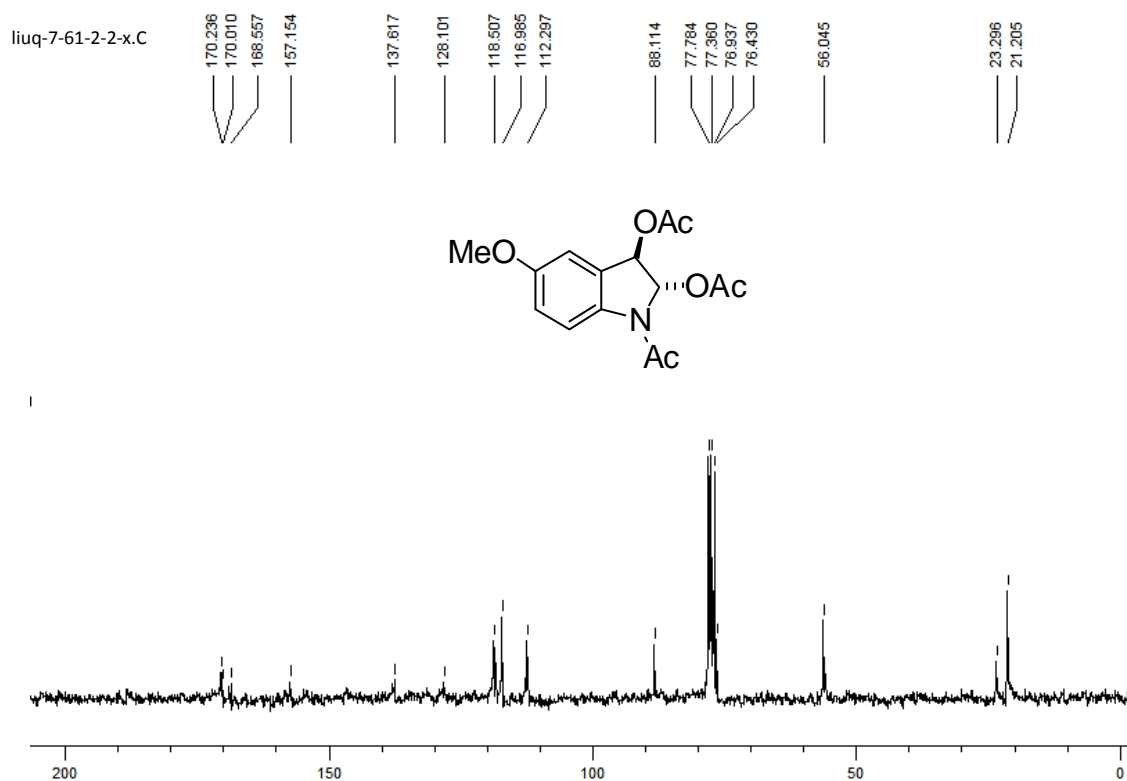

Display Report

|                      |                              |                                       |           |
|----------------------|------------------------------|---------------------------------------|-----------|
| <b>Analysis Info</b> |                              | Acquisition Date 9/15/2010 9:46:28 AM |           |
| Analysis Name        | D:\Data\zfj\2010915_000003.d | Operator                              | FTMS_USER |
| Method               | XMASS_Method                 | Instrument                            | apex-III  |
| Sample Name          | 184-1                        |                                       |           |
| Comment              |                              |                                       |           |

Acquisition Parameter

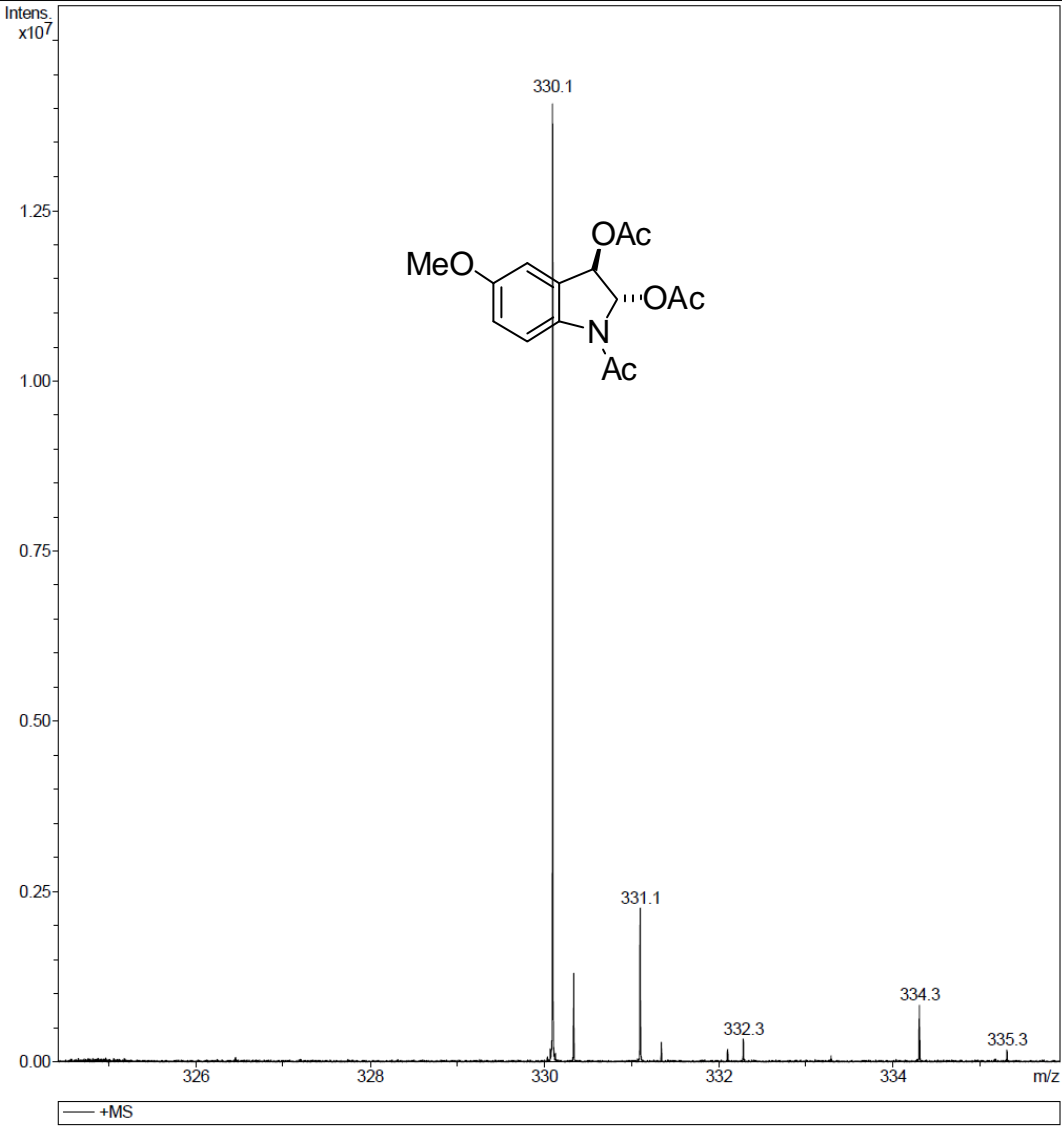



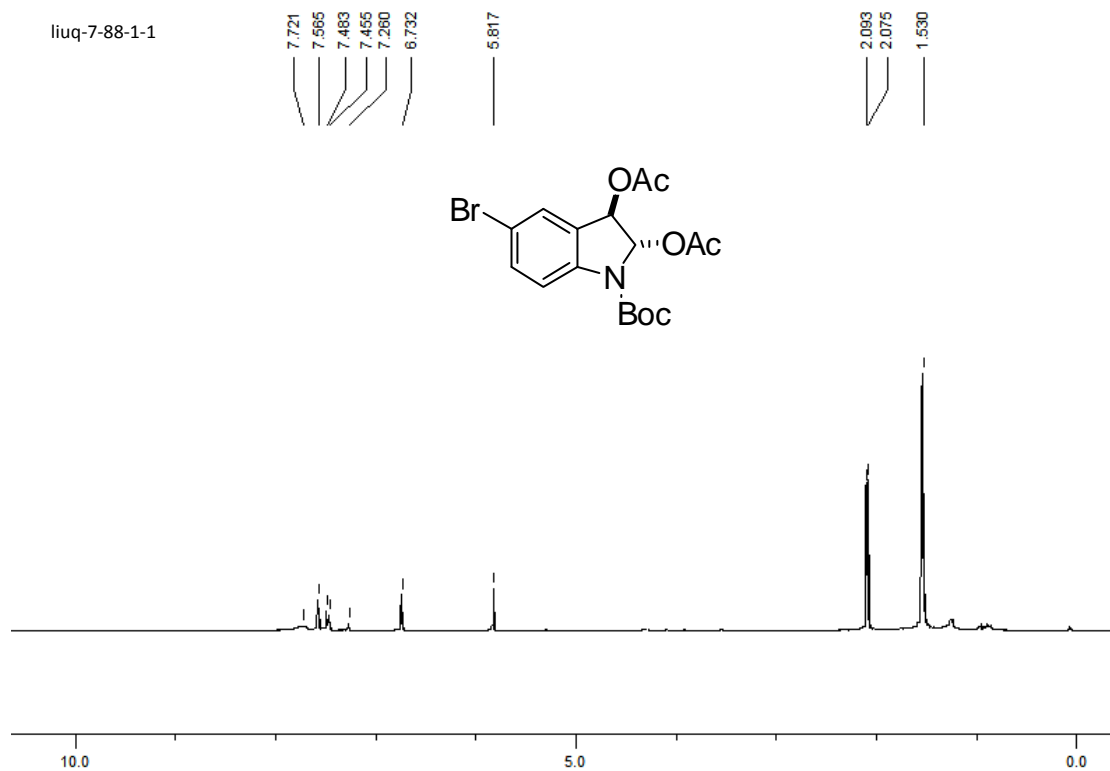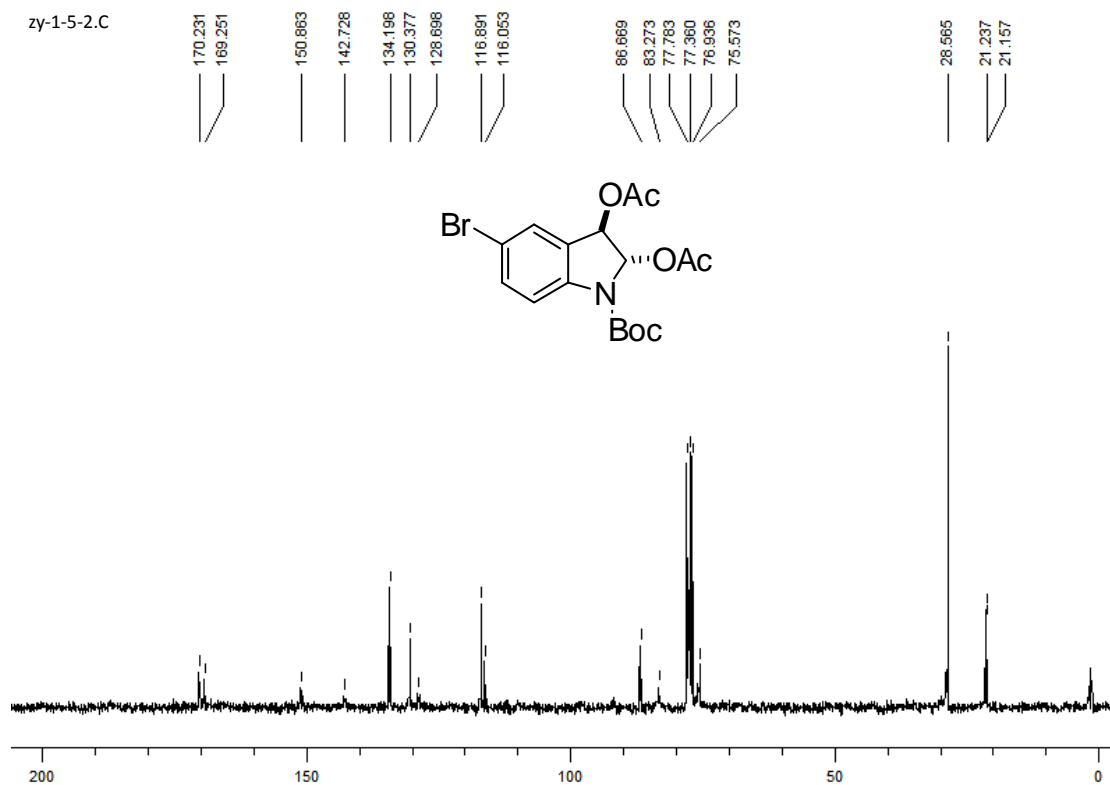

zy-1-25-2-2-B

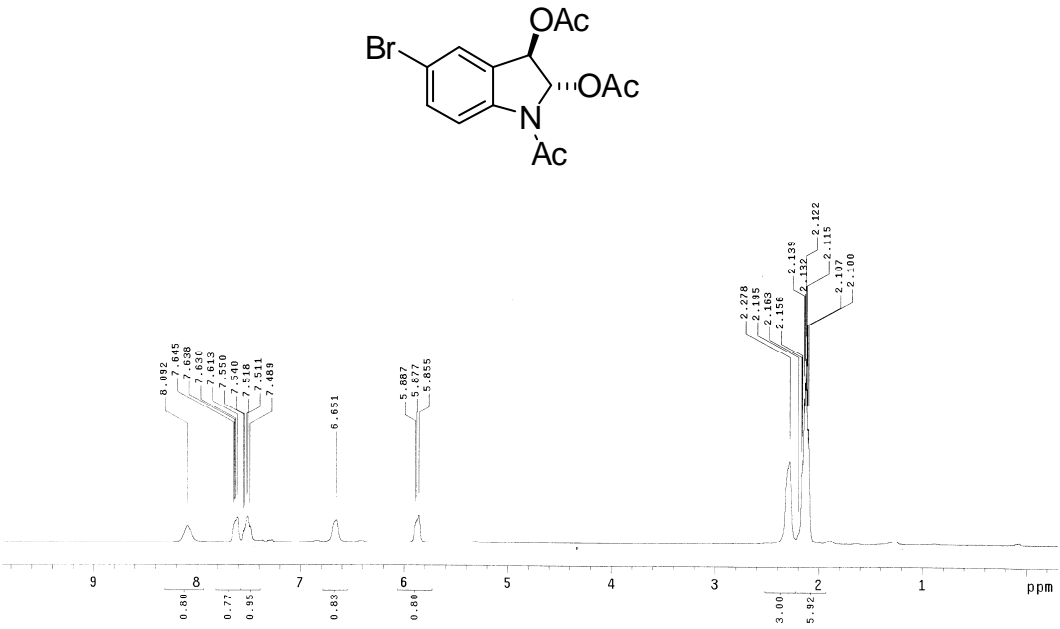

zy-1-25-2-2-B.C

Solvent: DMSO  
Ambient temperature  
Mercury-300BB "mercury300"  
  
Relax. delay 1.000 sec  
Pulse 28.0 degrees  
Acq. time 0.501 sec  
Width 17241.4 Hz  
10240 repetitions  
OBSERVE C13, 75.4552408 MHz  
DECOUPLE H1, 300.0030216 MHz  
Power 40 dB  
continuously on  
WALTZ-16 modulated  
DATA PROCESSING  
Line broadening 4.0 Hz  
FT size 32768  
Total time 4 hr, 48 min, 17 sec

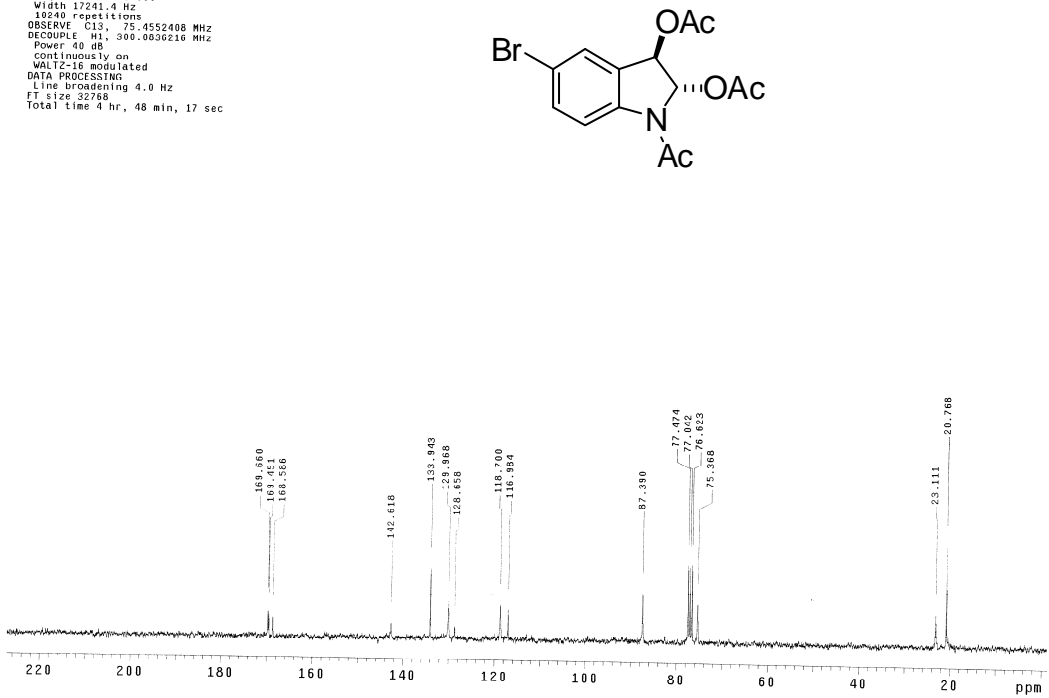

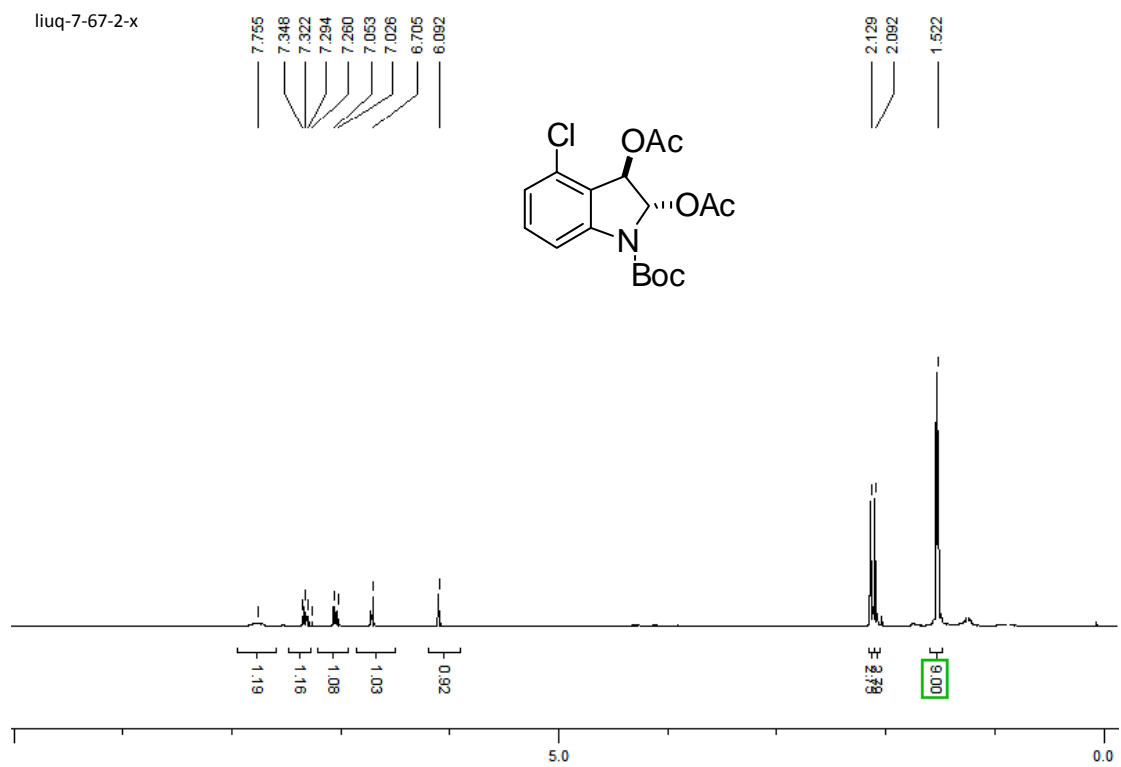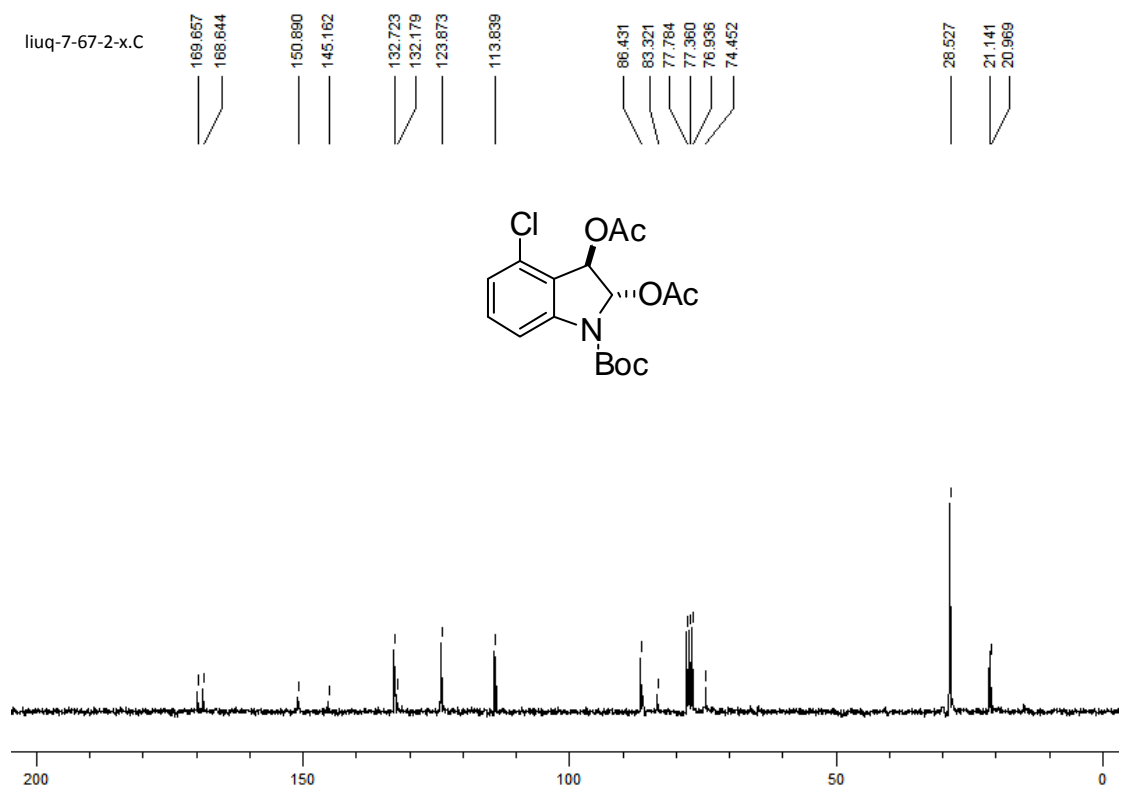

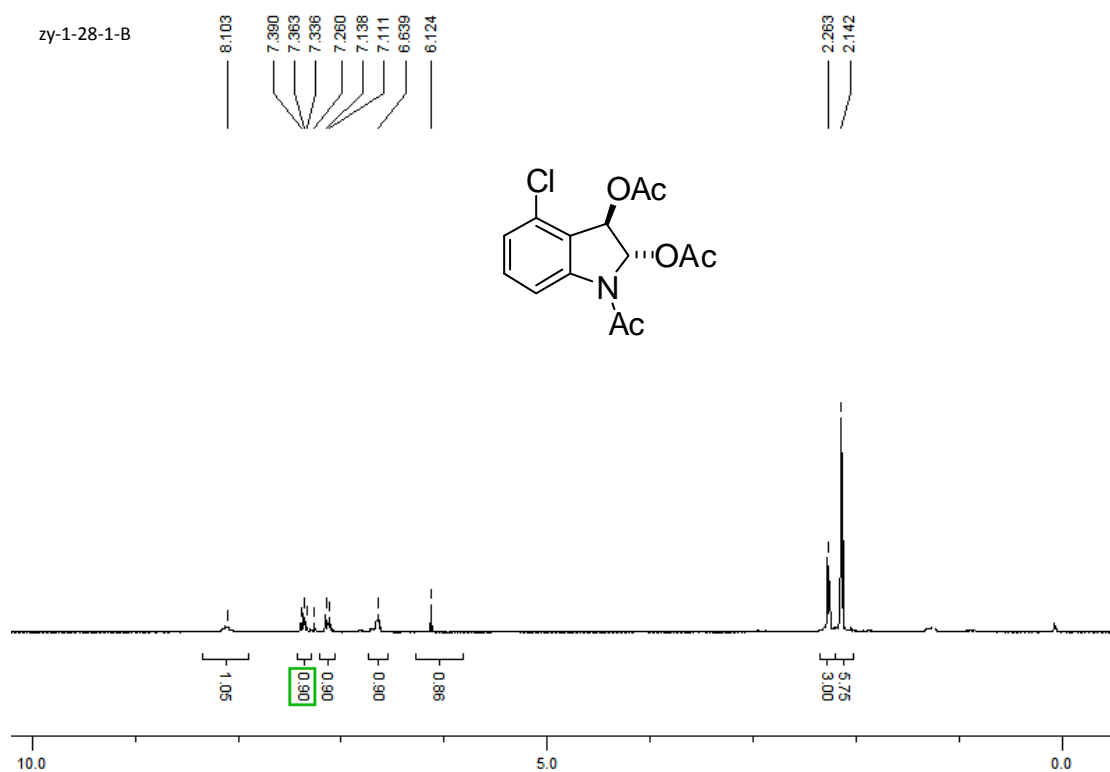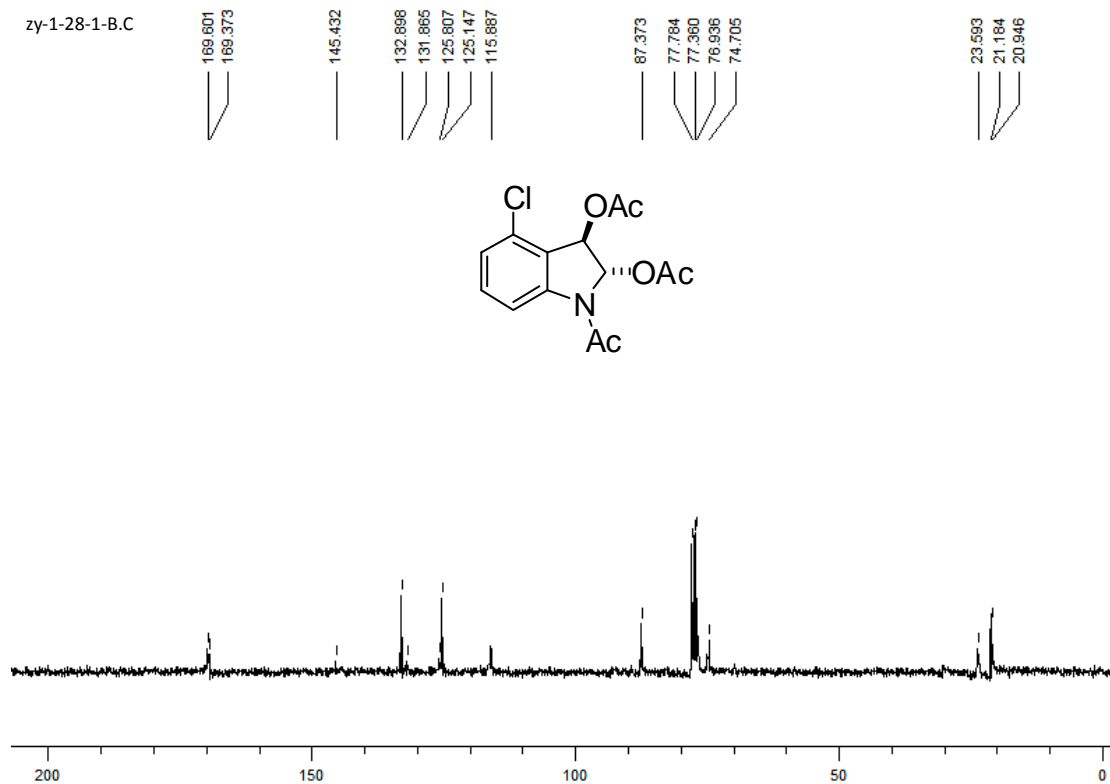

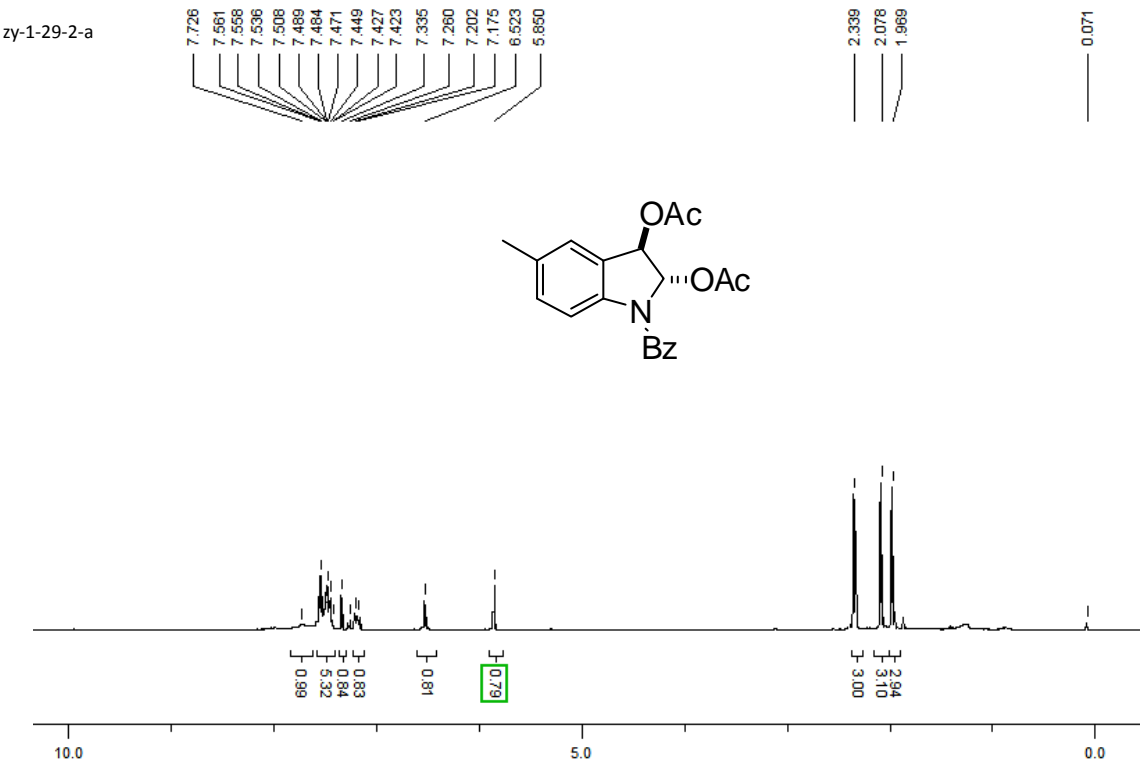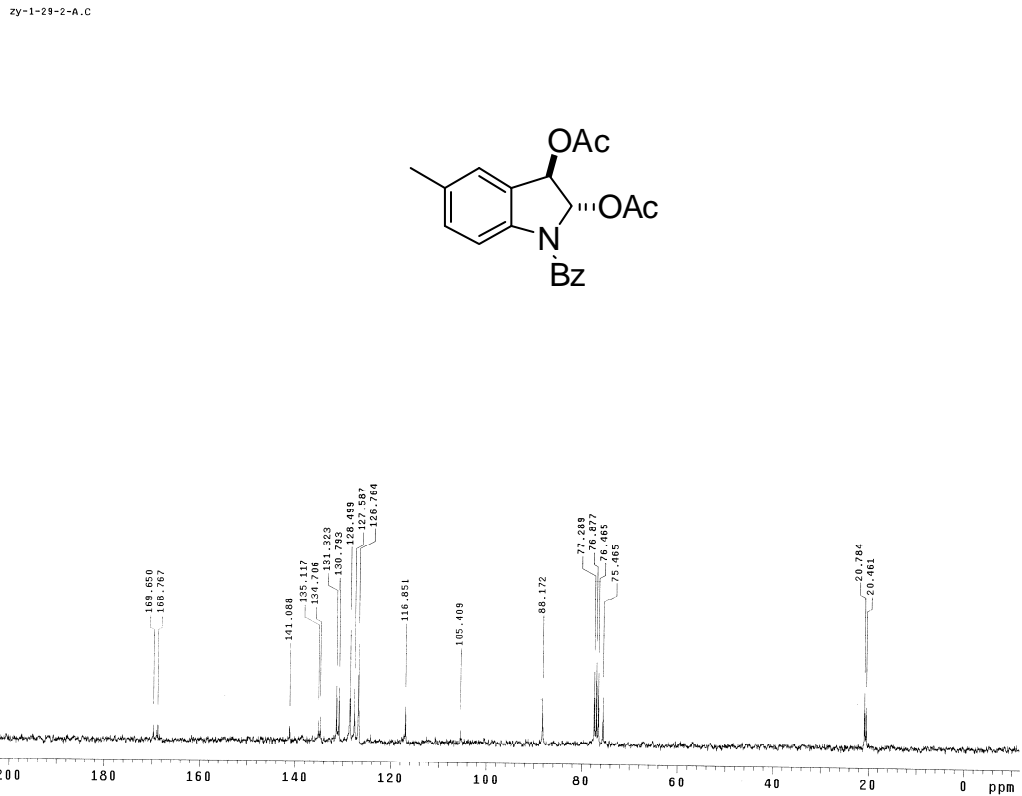

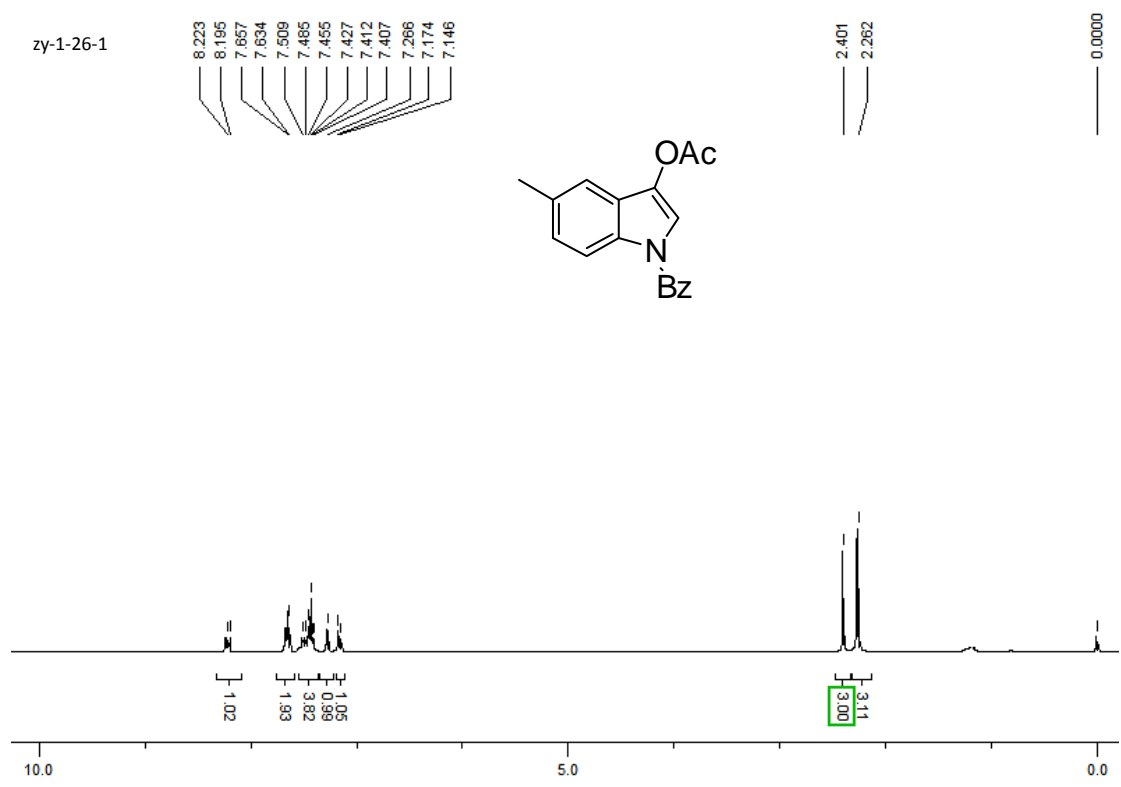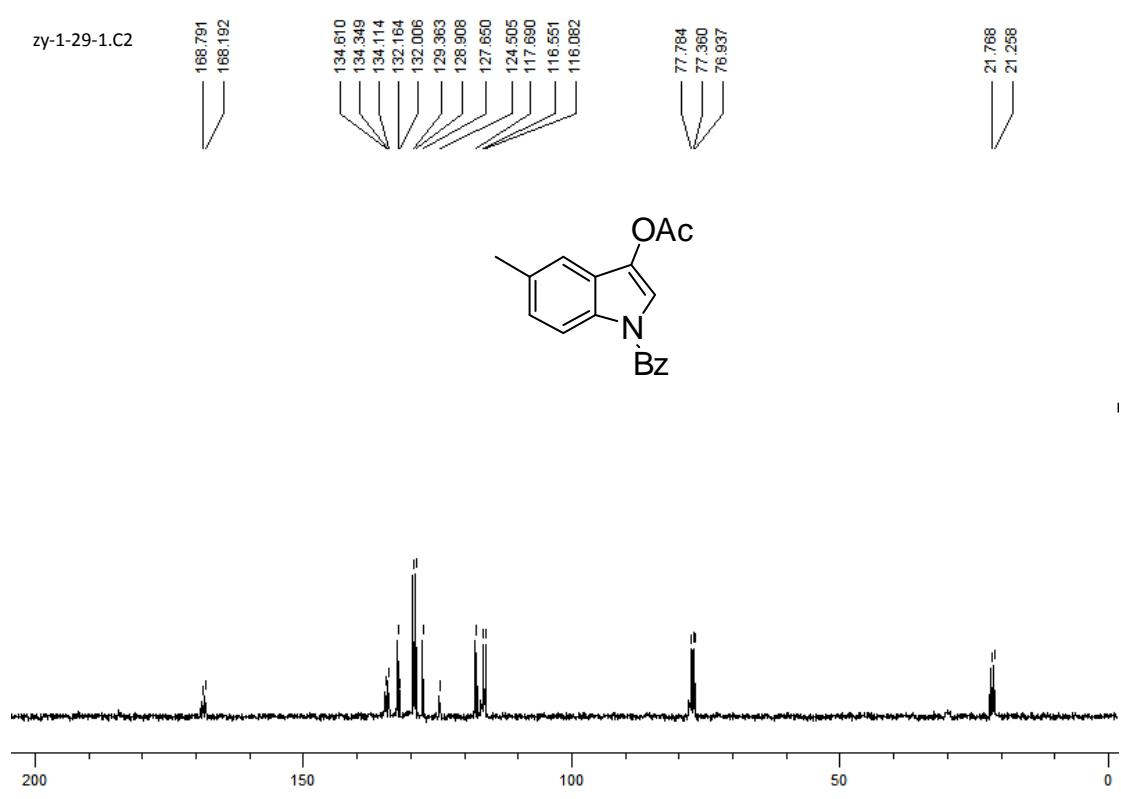

zy-1-65-B

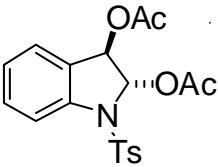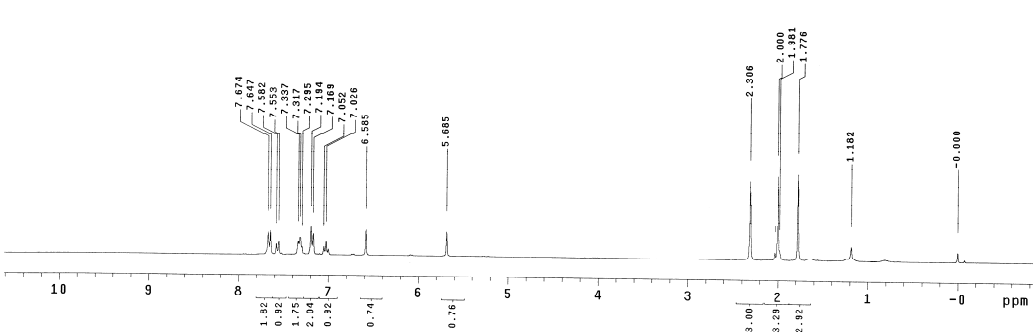

zy-1-65-B.C

Solvent: CDCl<sub>3</sub>  
Ambient temperature  
Mercury-300SB "mercury200"  
Relax. delay 1.000 sec  
Pulse 28.0 degrees  
Acq. time 0.501 sec  
Width 17241.4 Hz  
98 repetitions  
OBSERVE C13, 75.4552538 MHz  
DECOUPLE H1, 300.0821962 MHz  
Power 40 dB  
continuously on  
WALTZ-16 modulated  
DATA PROCESSING  
Line broadening 2.0 Hz  
FT size 32768  
Total time 1 hr, 55 min, 18 sec

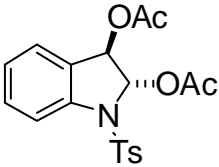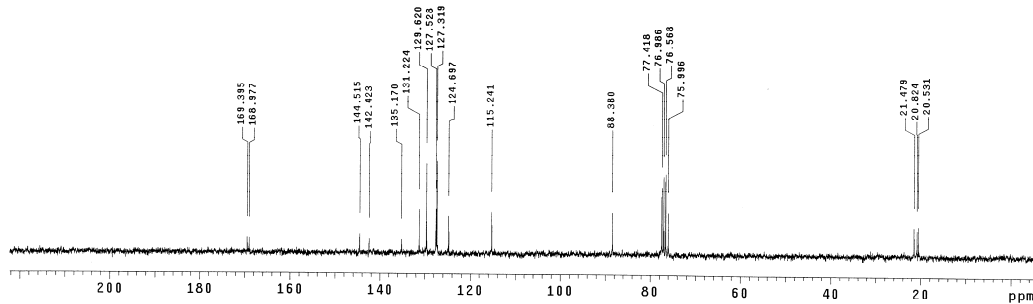

zy-1-124-2-2-a

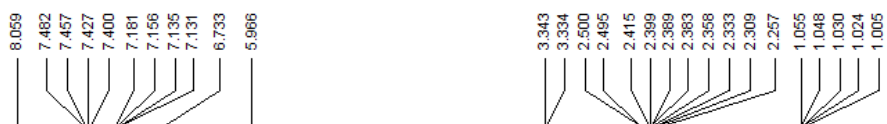

zy-1-124-2-2-a. C

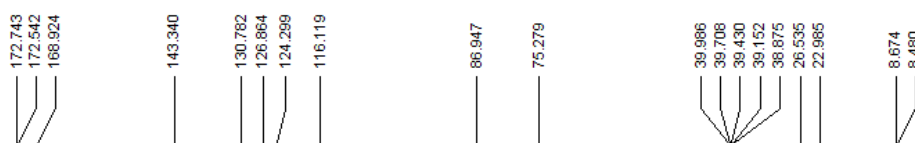



zy-1-129-1-1-DMSO

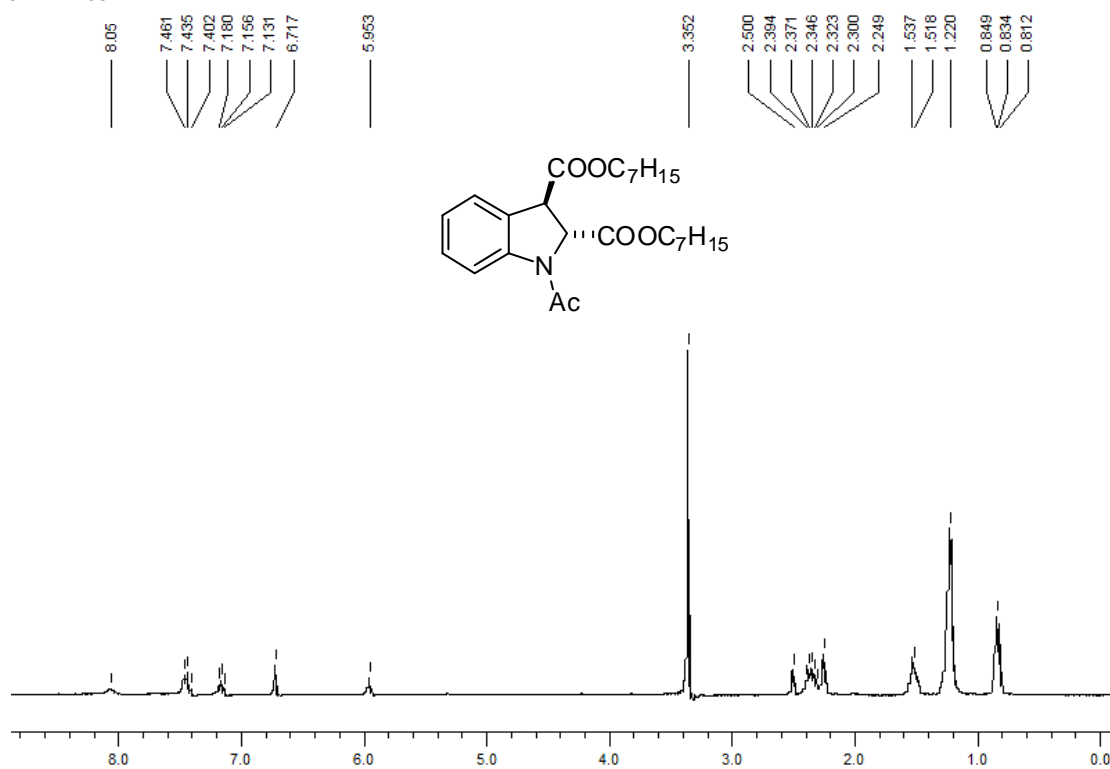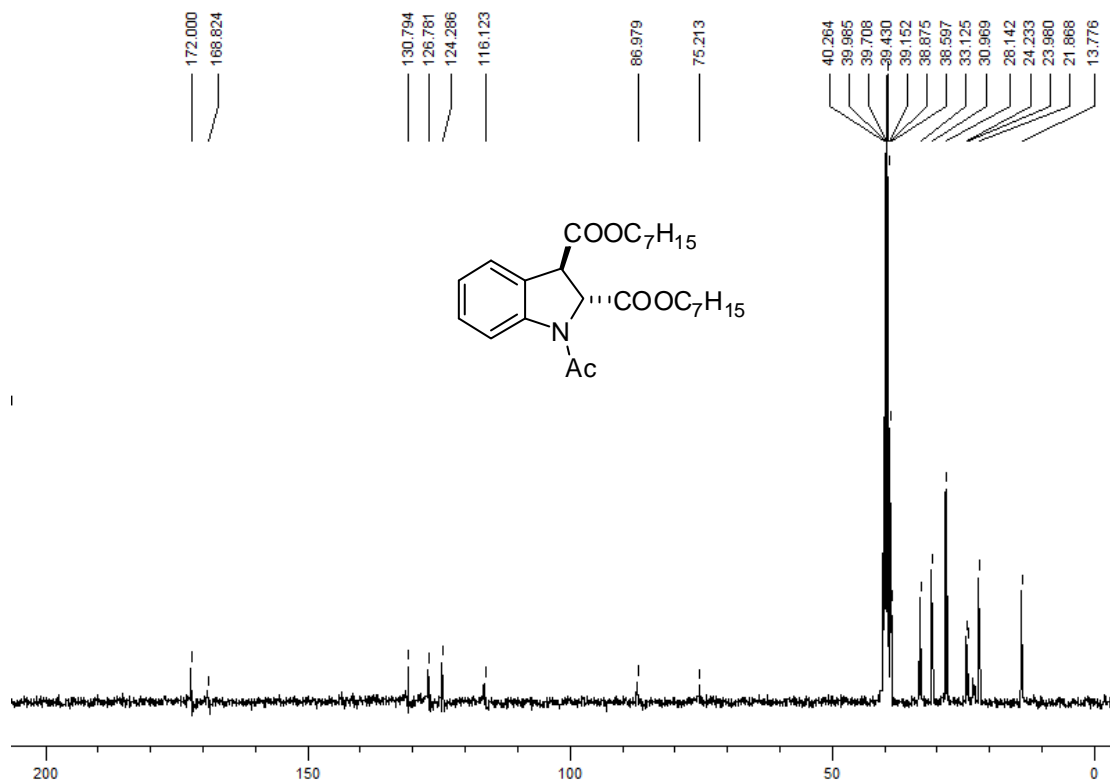

zy-1-127-1-1

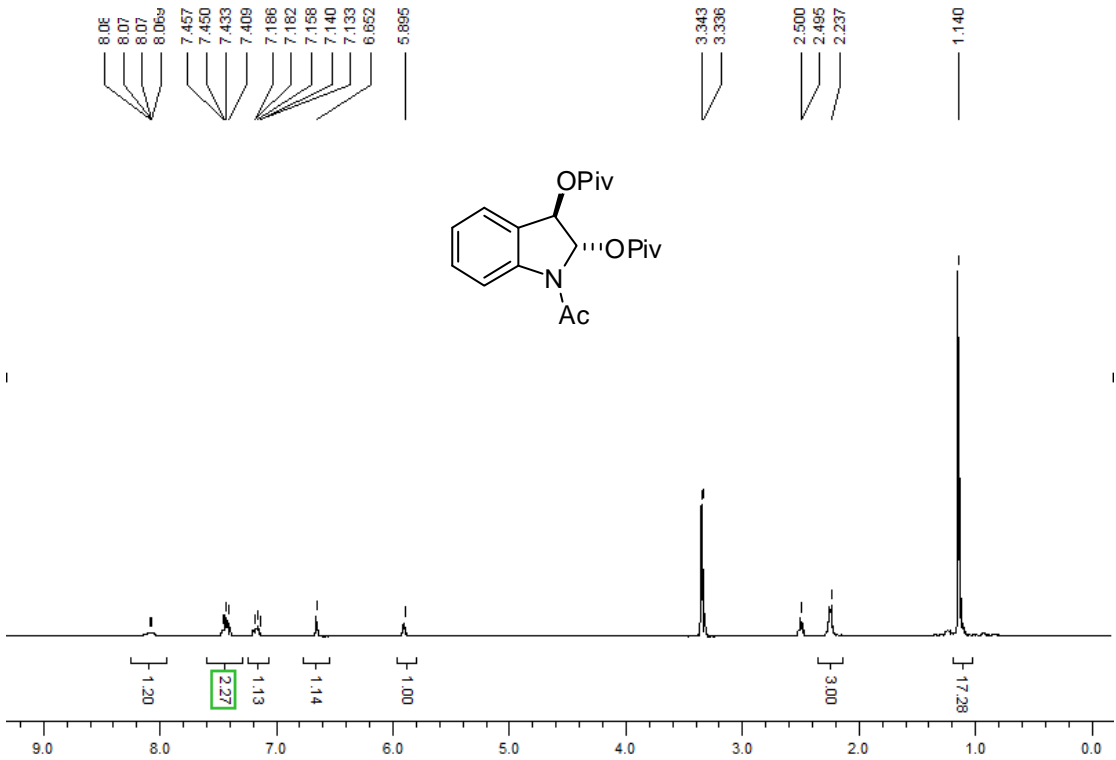

zy-1-127-1-1.C

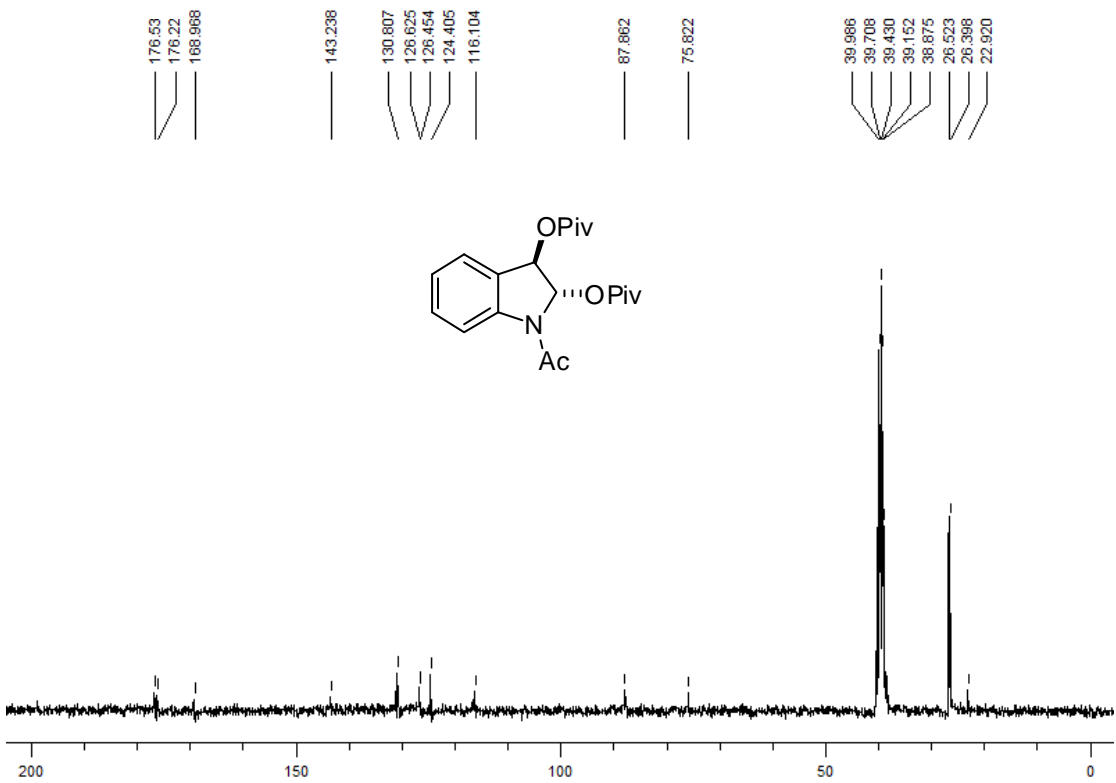

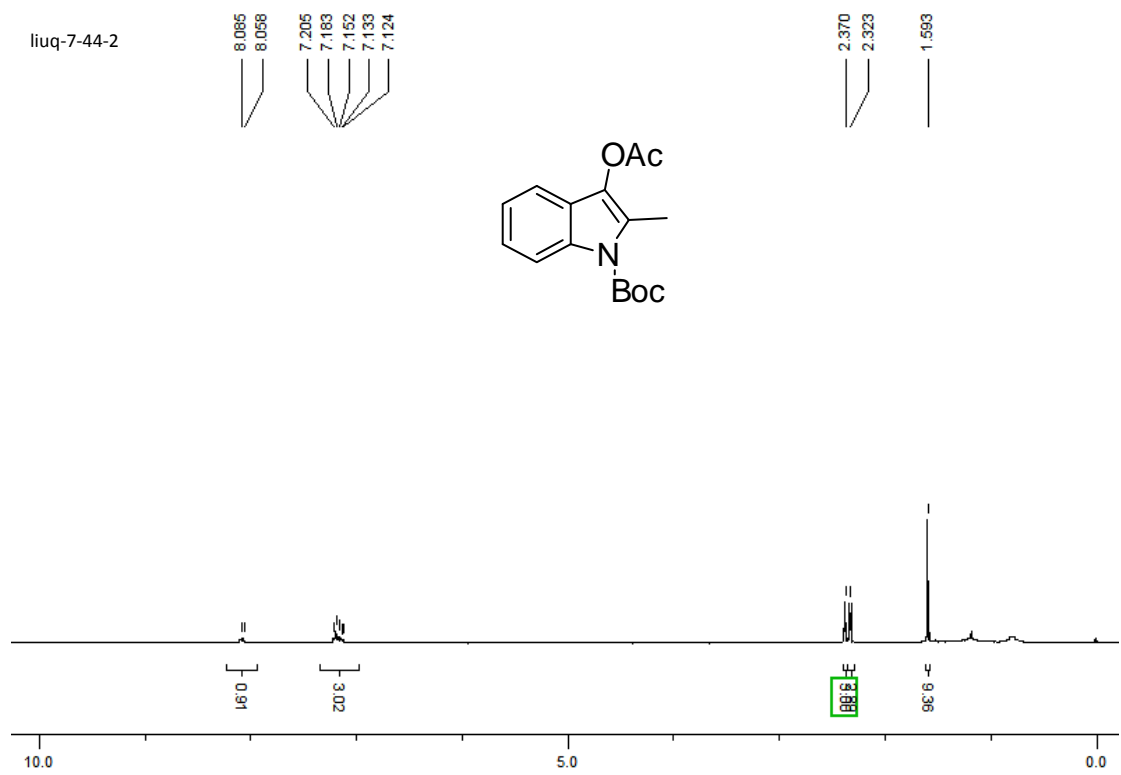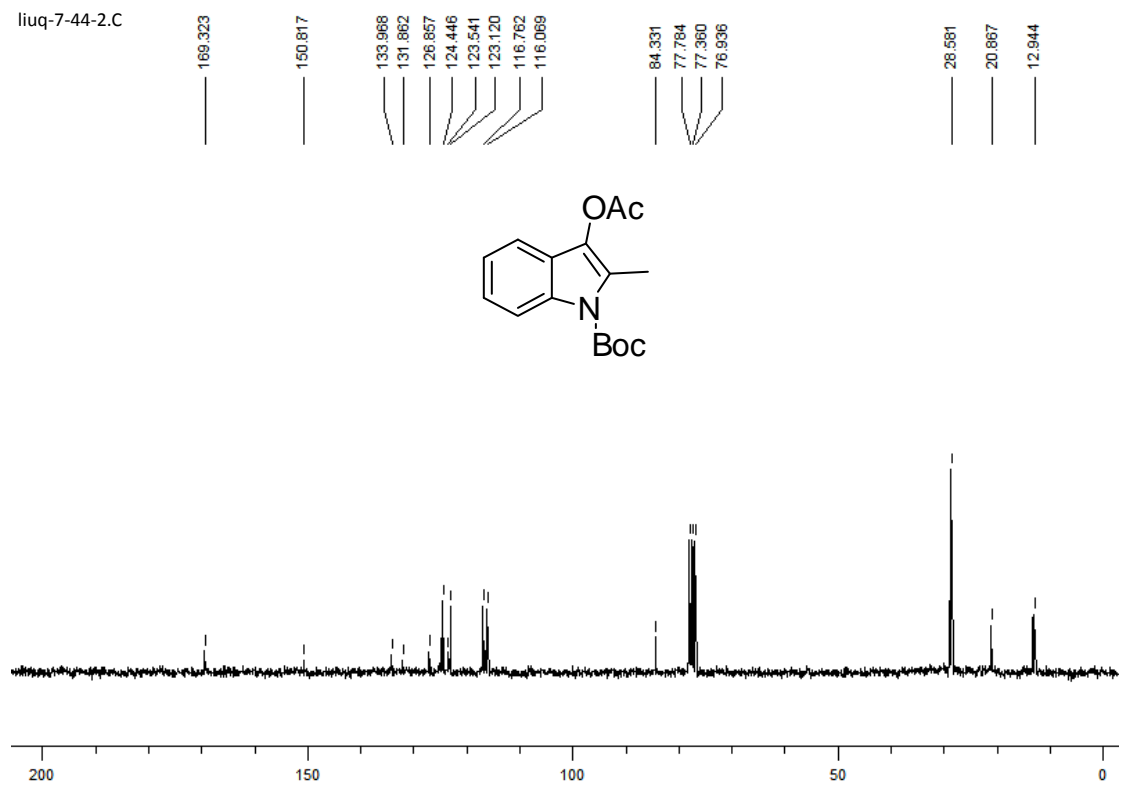

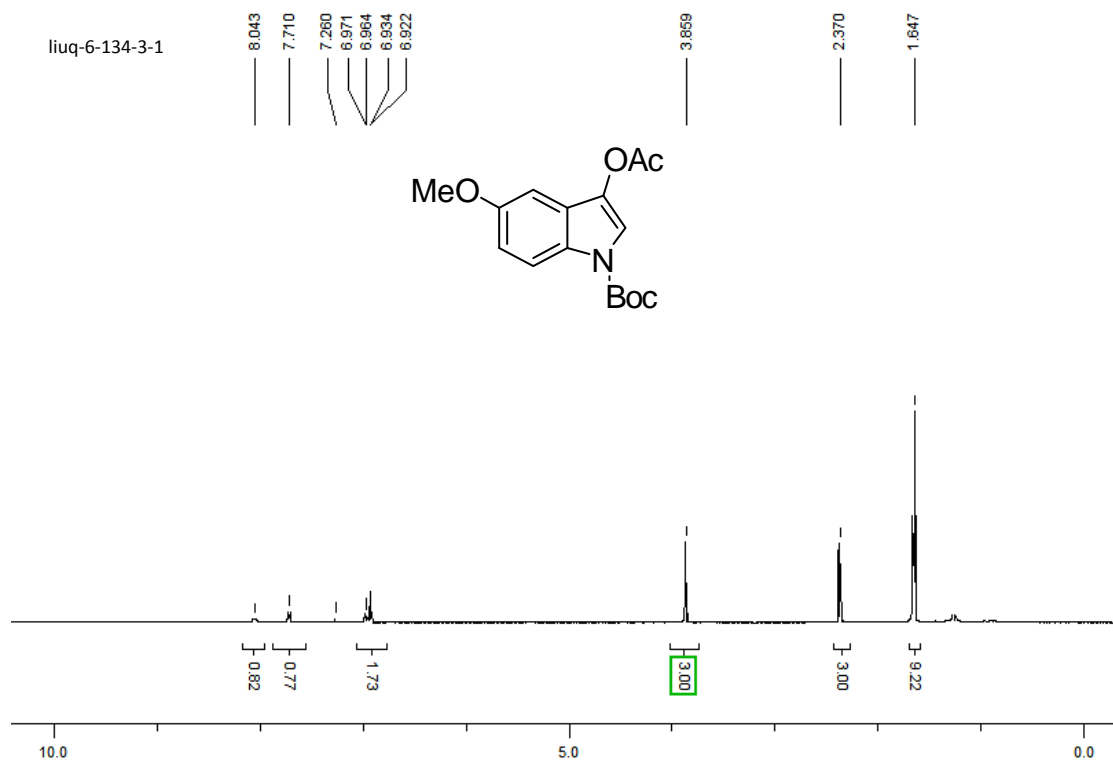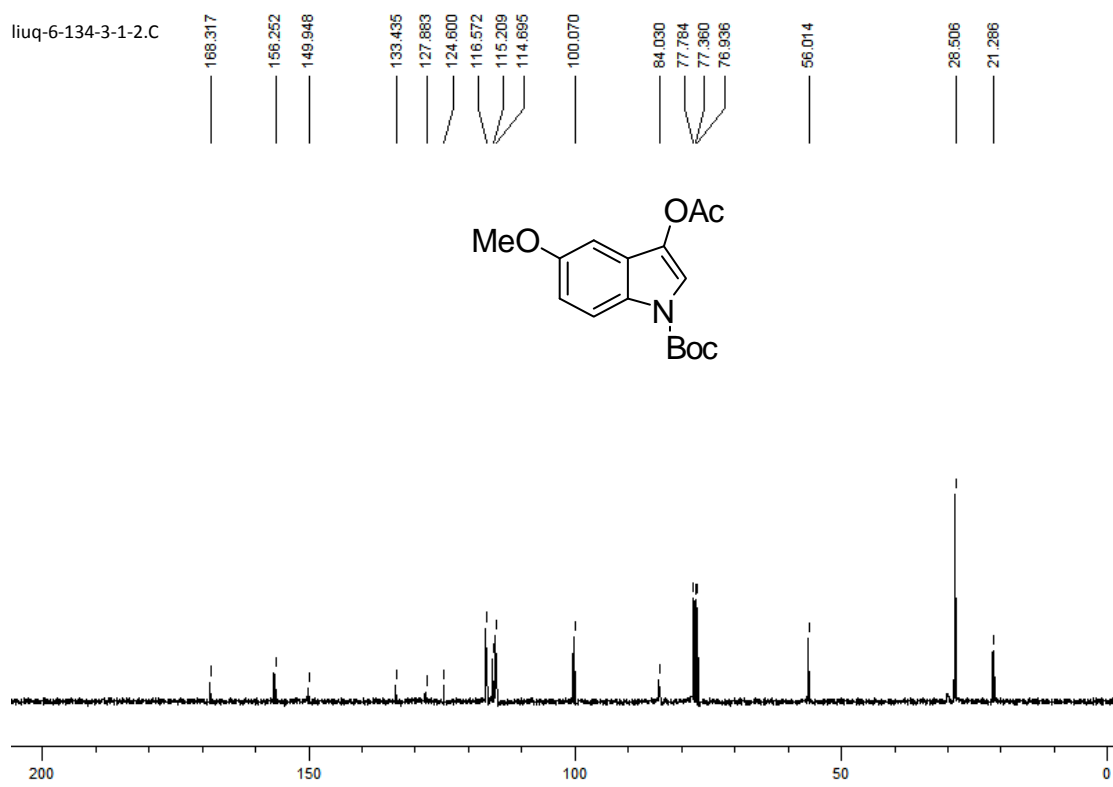

Display Report

Analysis Info

Analysis Name D:\Data\zff\2010915\_000011.d  
Method XMASS\_Method  
Sample Name 184-4  
Comment

Acquisition Date 9/15/2010 1:18:44 PM

Operator FTMS\_USER  
Instrument apex-III

Acquisition Parameter

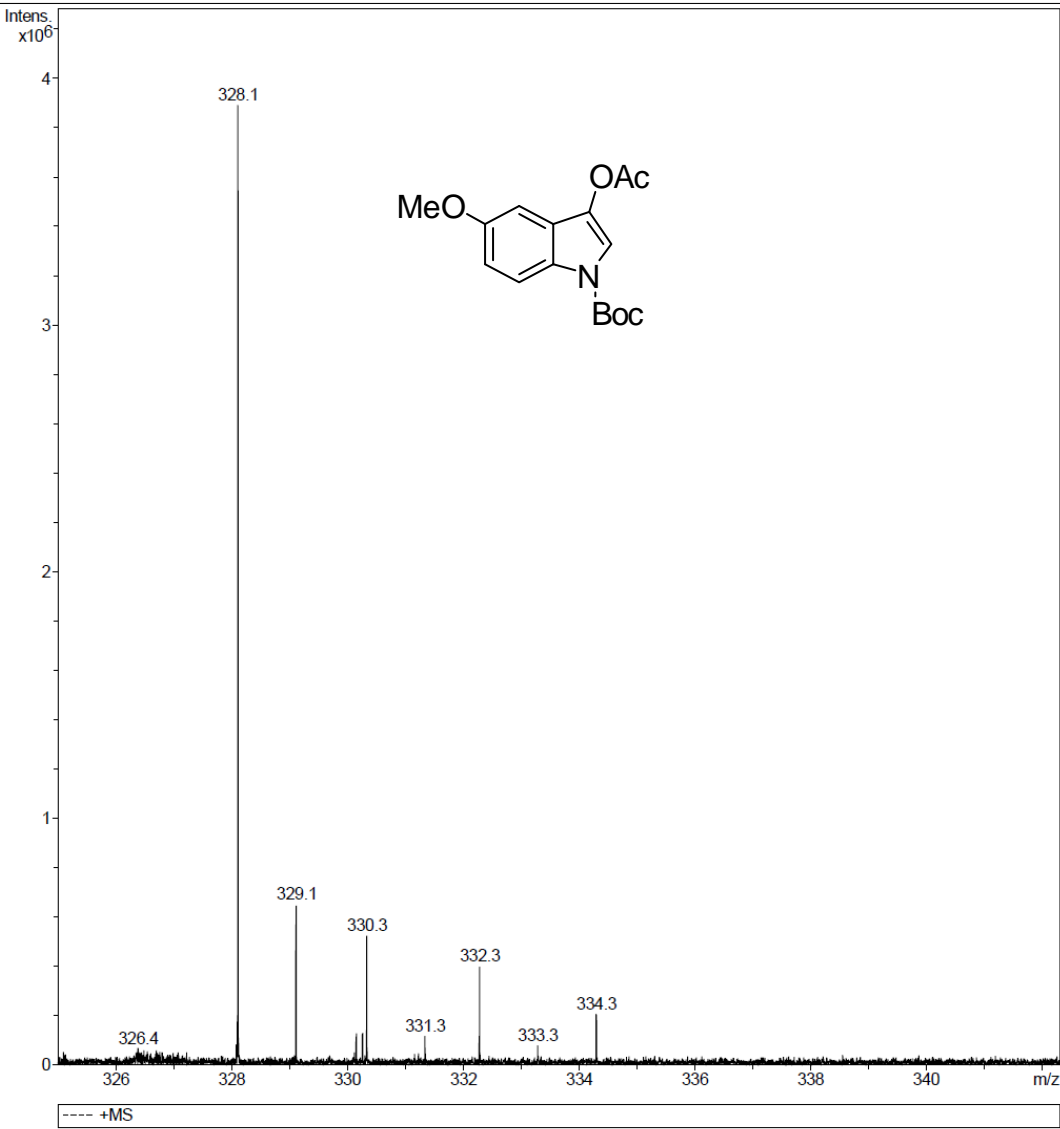

liuq-5-190-3

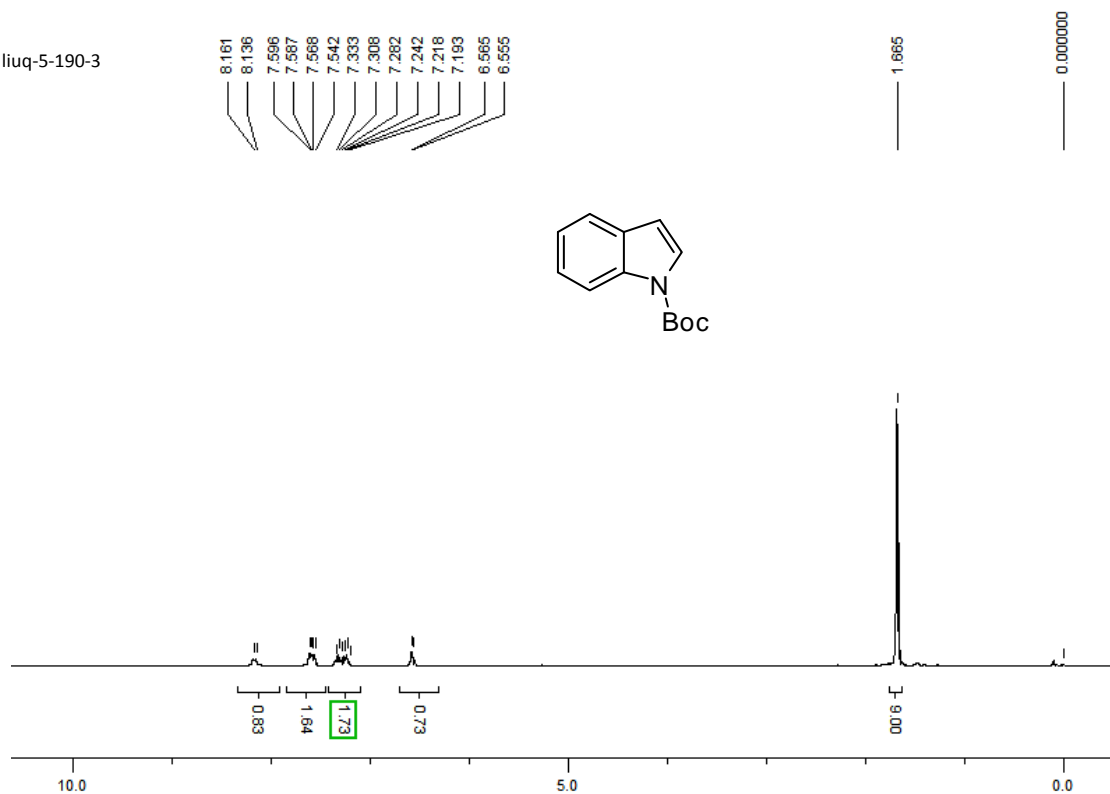

liuq-6-98-2

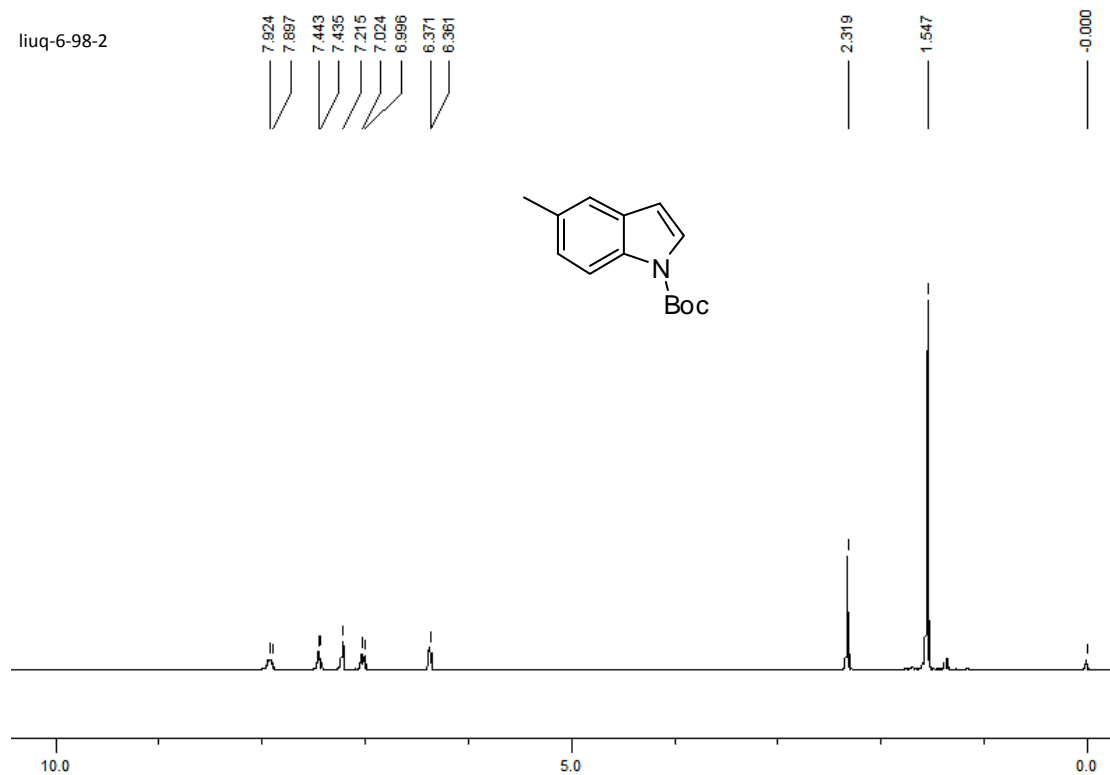

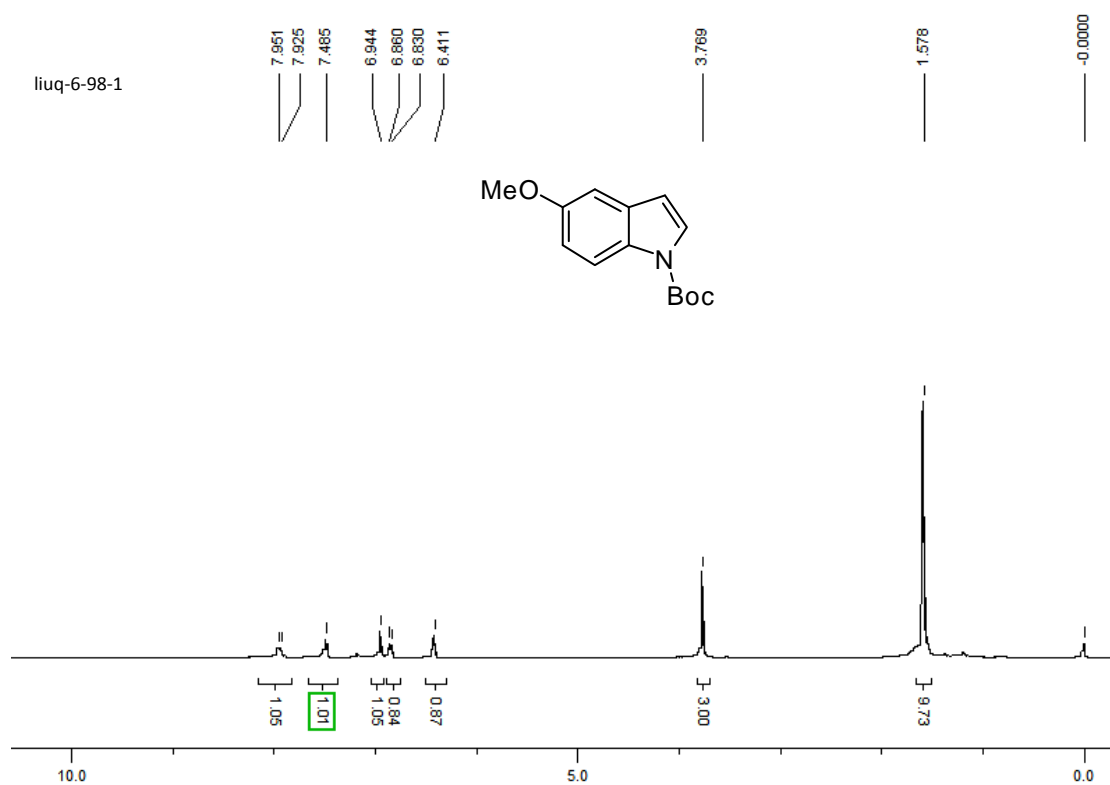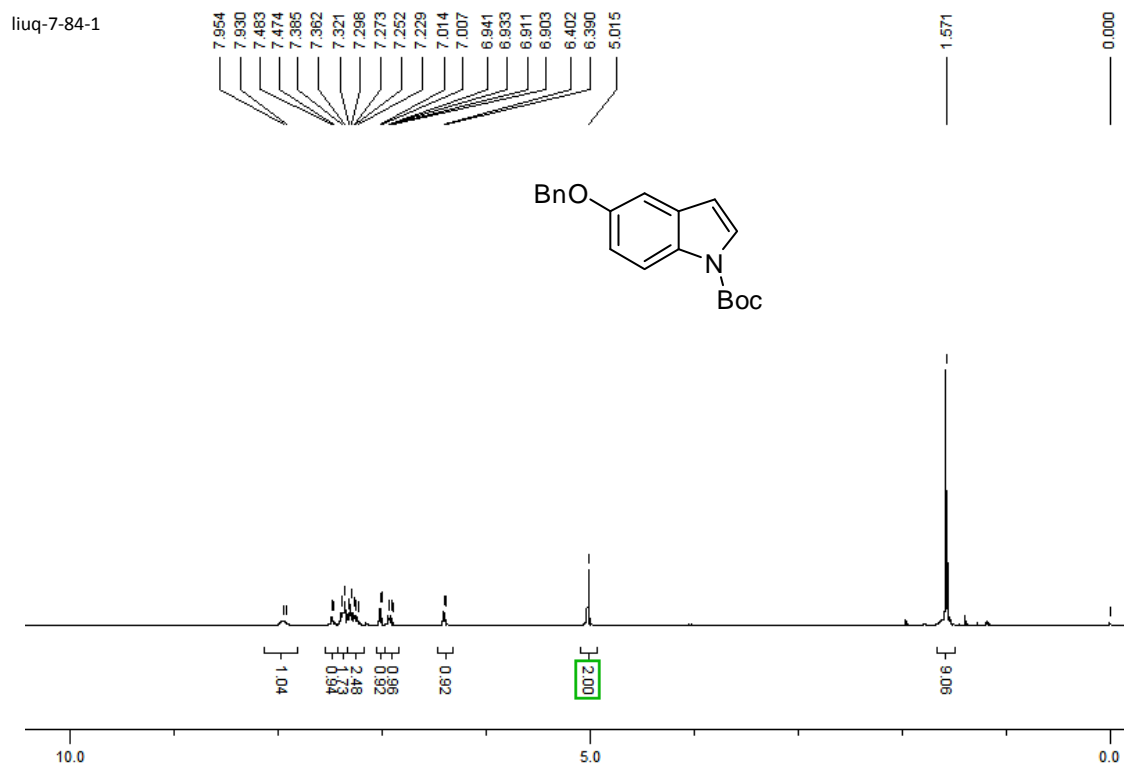

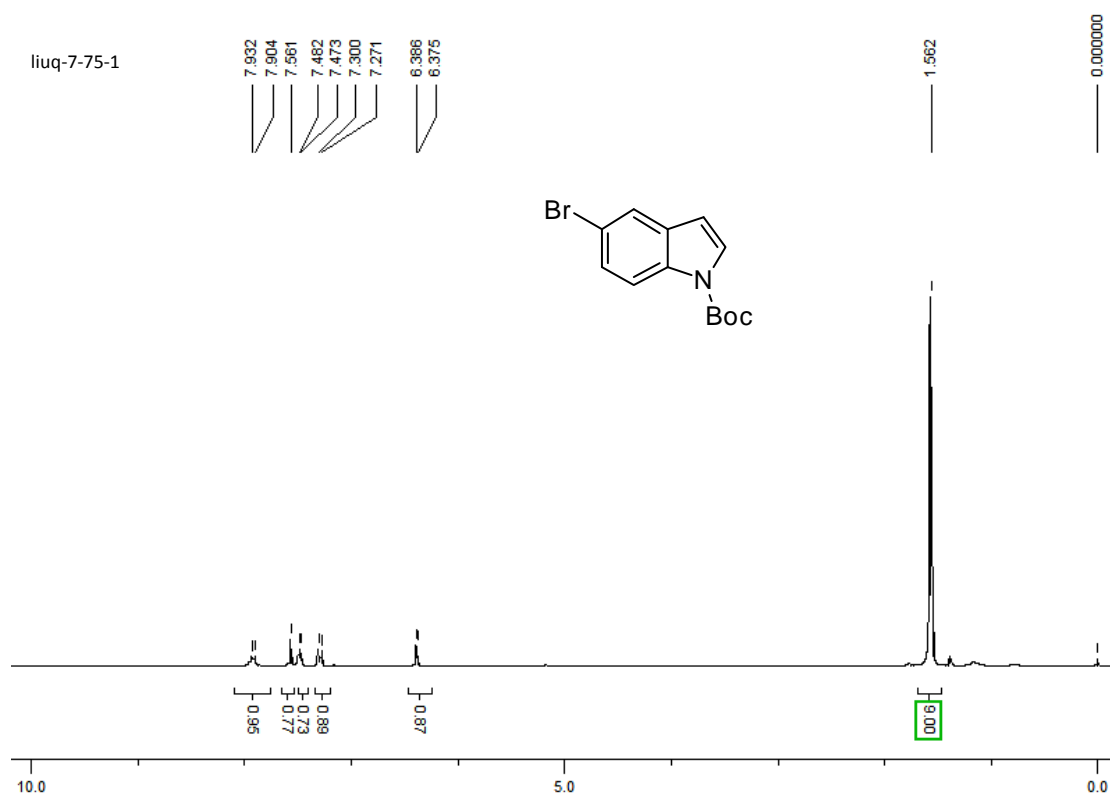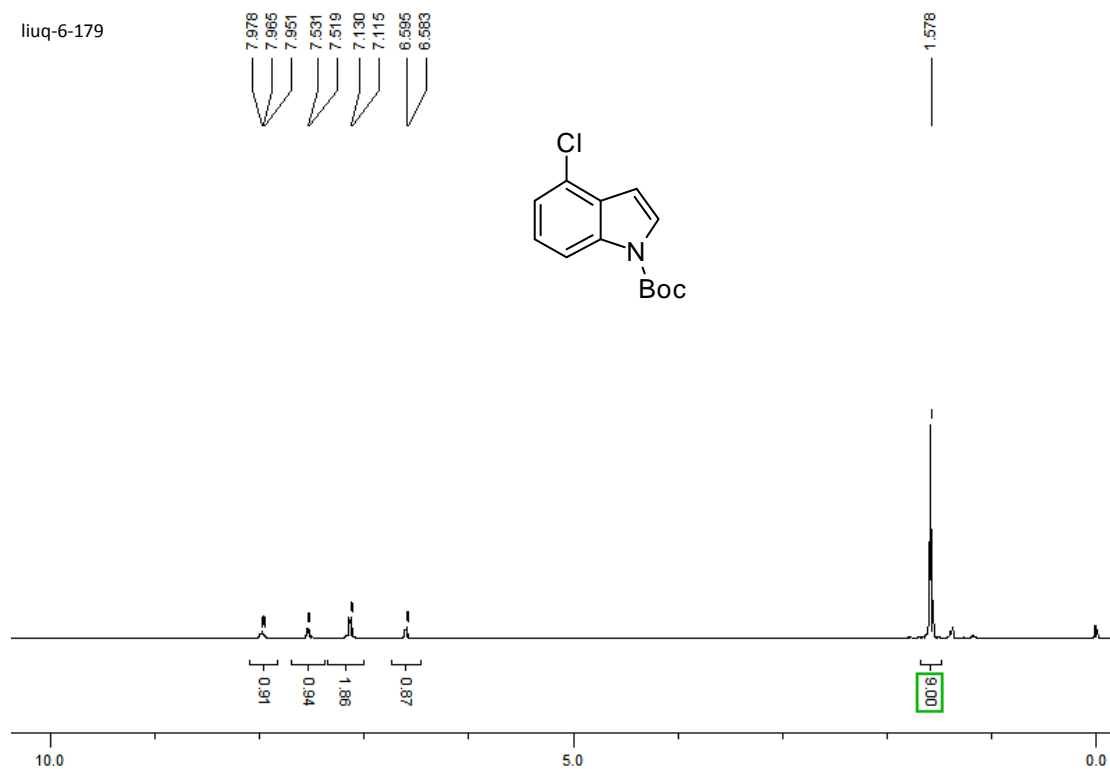



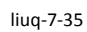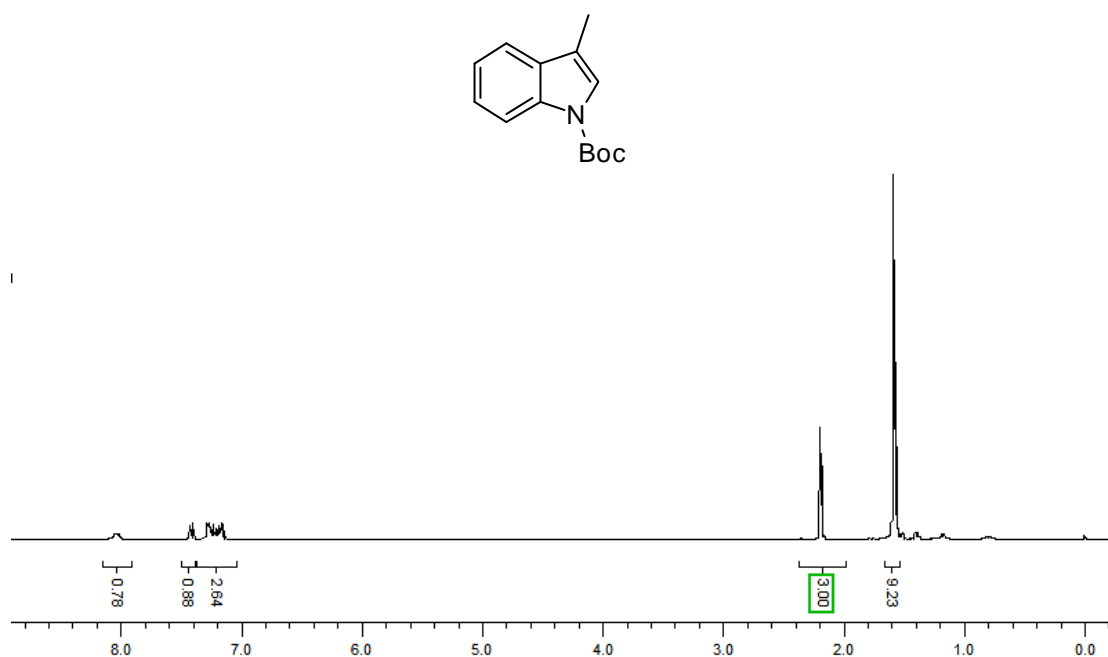

liuq-6-81-3

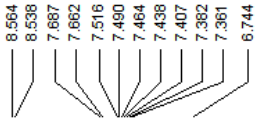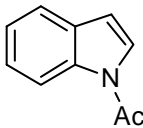

1

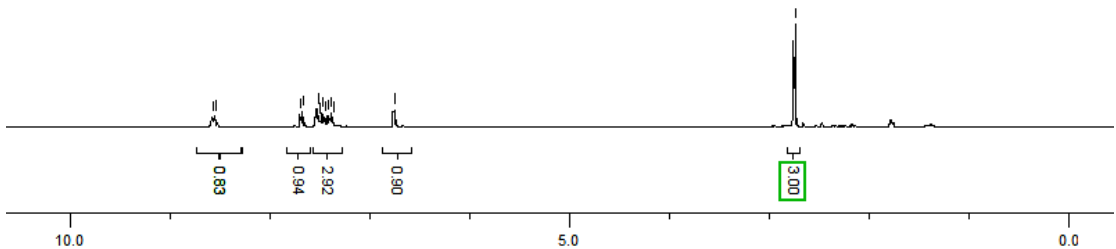

liuq-6-90-2

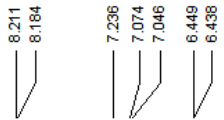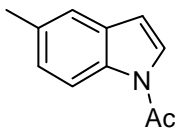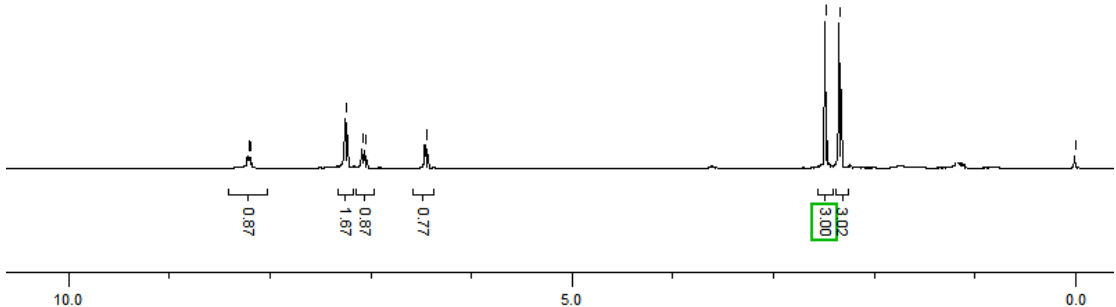

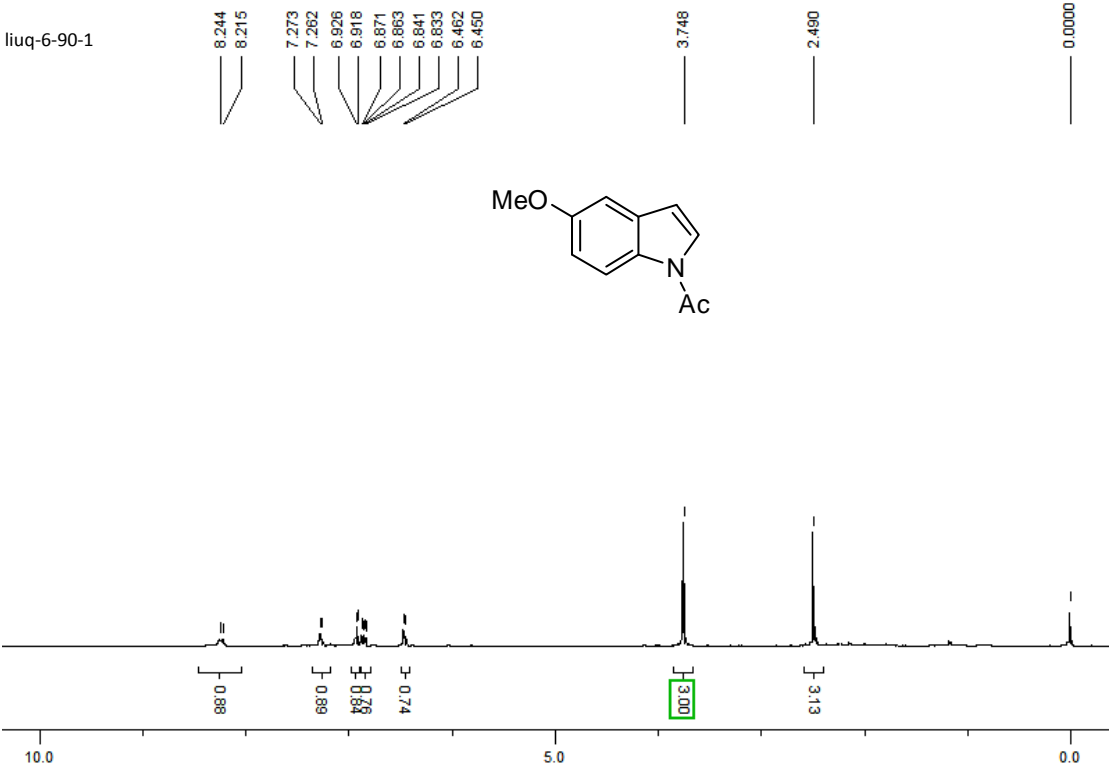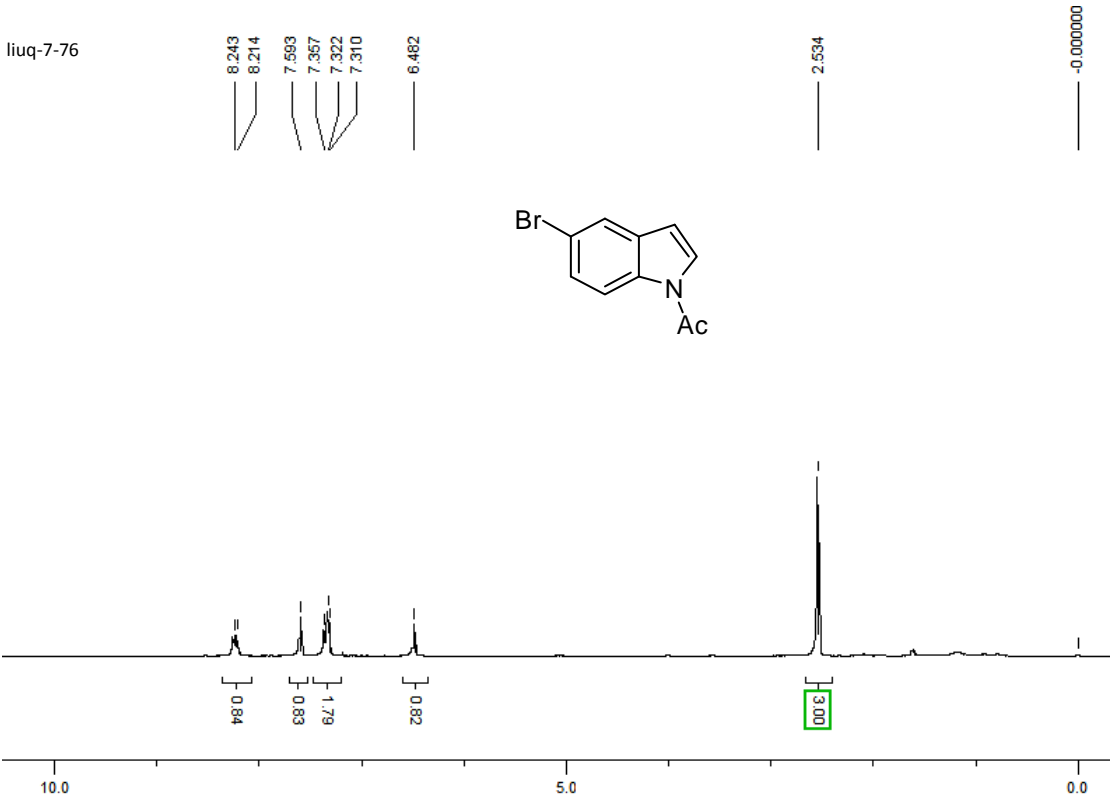

zy-1-25-1

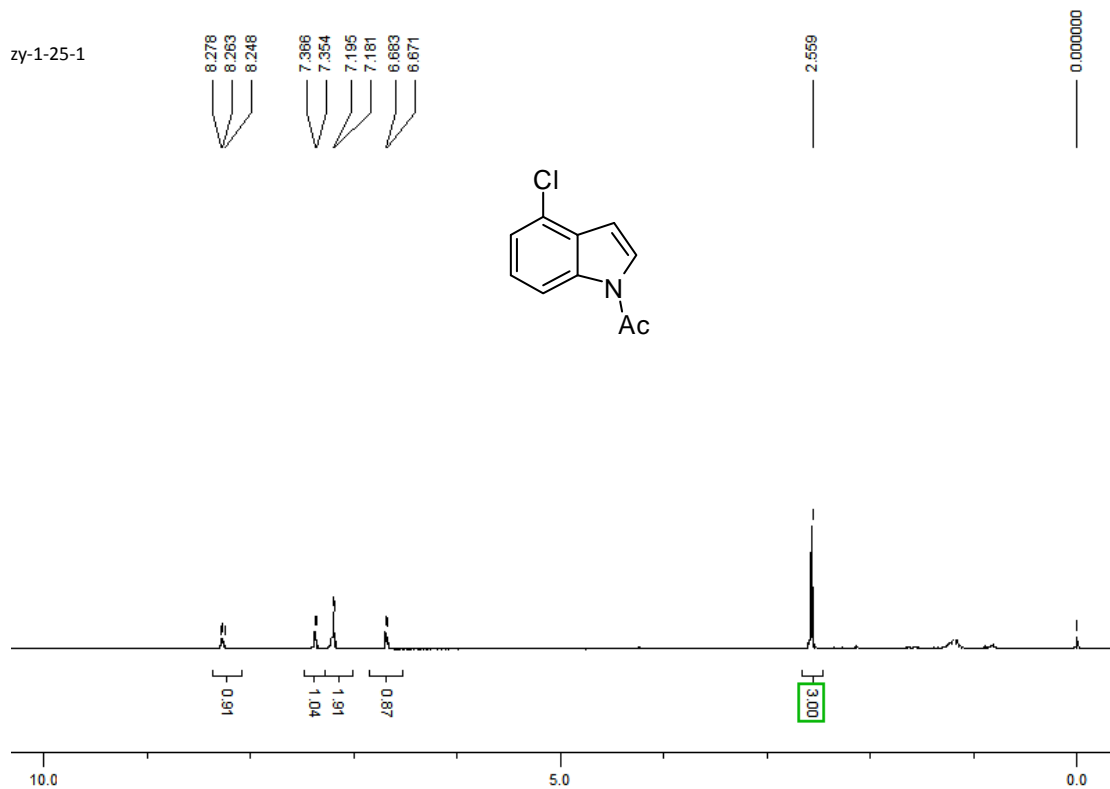

Liuq-7-98-1-2

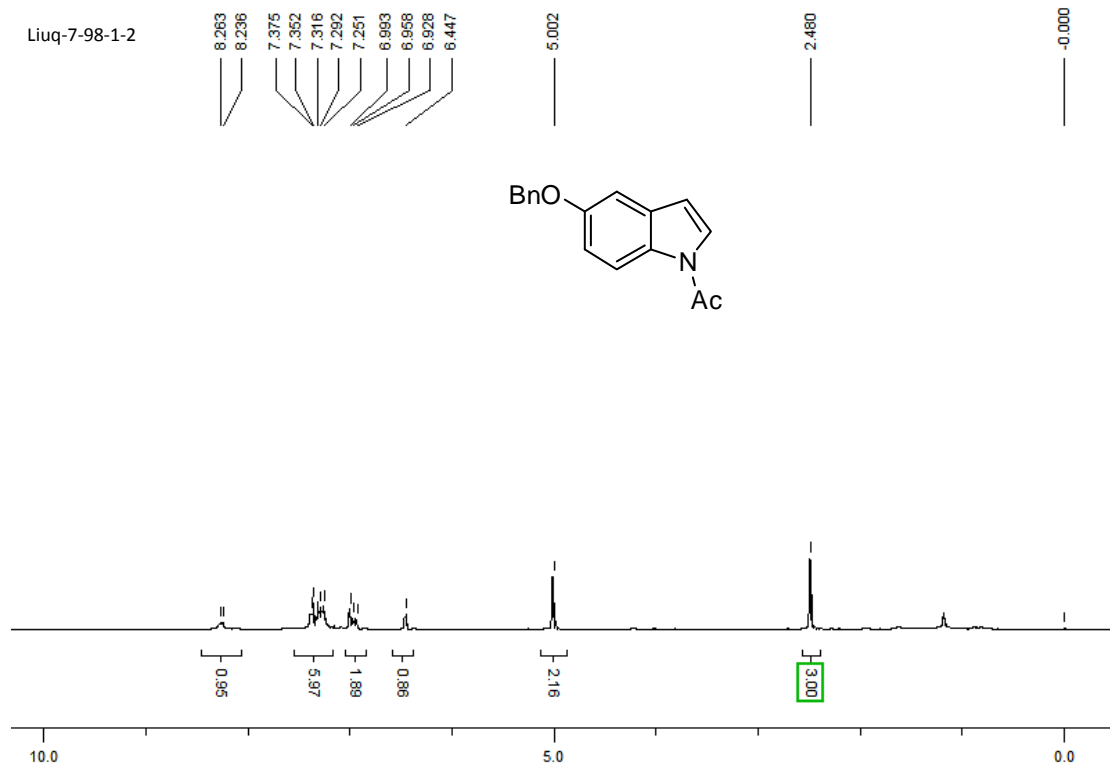

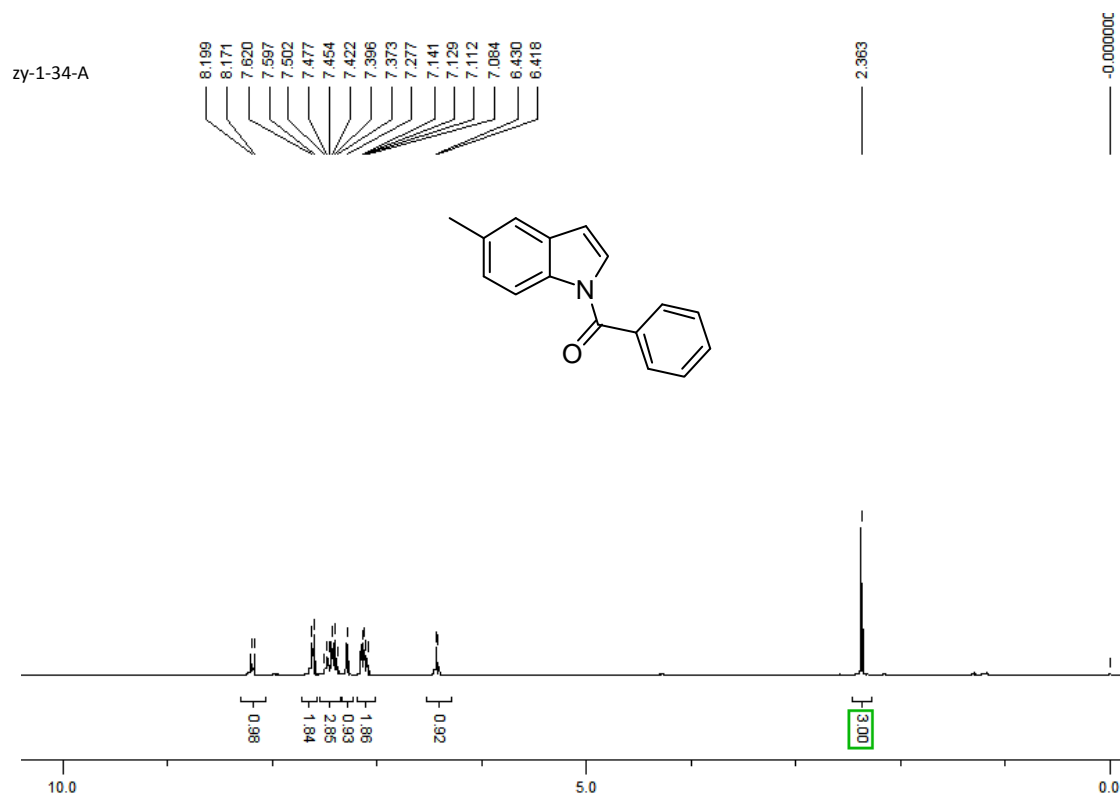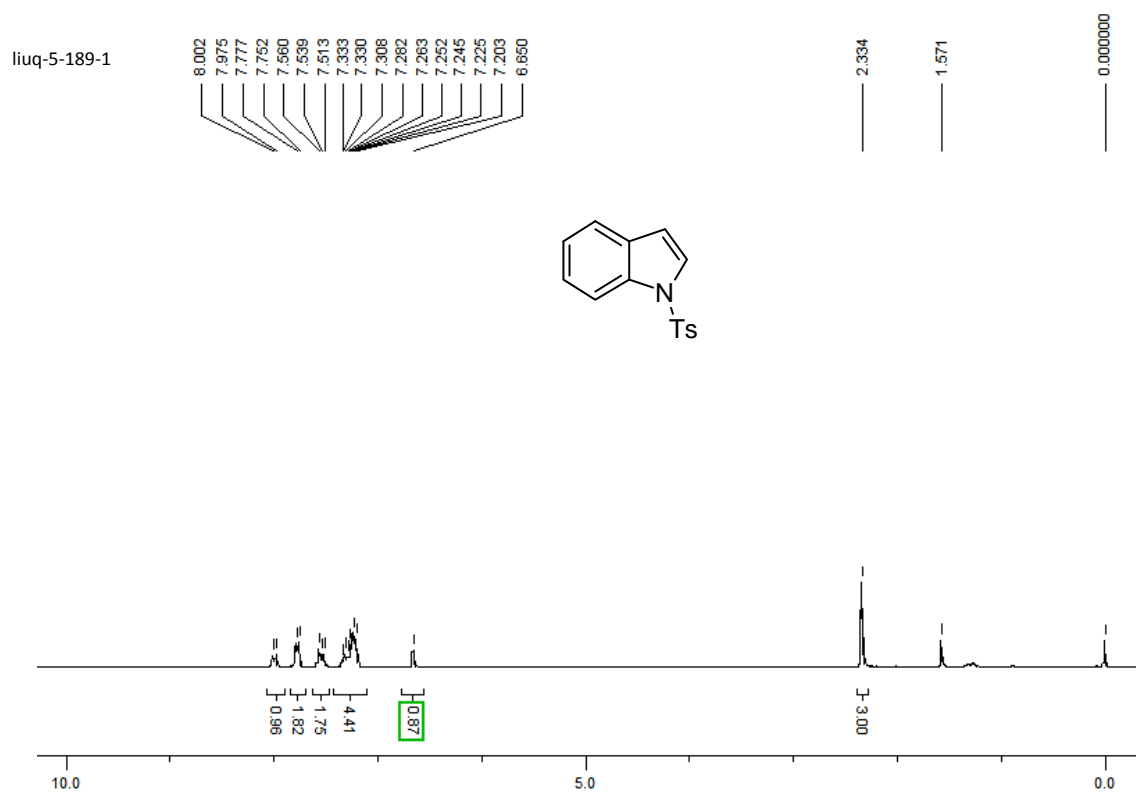

Supplement: c2cc17815j.pdf [file c2cc17815j.pdf]
